1 **A heterochromatin domain forms gradually at a new telomere and is highly dynamic at stable**  
2 **telomeres**

3  
4 Jinyu Wang<sup>a,c\*</sup>, Jessica R Eisenstatt<sup>b,c†</sup>, Julien Audry<sup>c</sup>, Kristen Cornelius<sup>d</sup>, Matthew Shaughnessy<sup>c</sup>,  
5 Kathleen L Berkner<sup>c</sup>, Kurt W Runge<sup>a,b,c,#</sup>

6  
7 Department of Genetics and Genome Sciences, Case Western Reserve University, Cleveland, OH,  
8 USA<sup>a</sup>; Department of Biochemistry, Case Western Reserve University, Cleveland, OH, USA<sup>b</sup>;  
9 Departments of Immunology and Molecular Genetics, Lerner Research Institute, Cleveland Clinic  
10 Foundation, Cleveland, OH, USA<sup>c</sup>; Department of Molecular Genetics, The Ohio State University,  
11 Columbus, OH, USA<sup>d</sup>

12  
13 Running Head: **Formation and stability of heterochromatin domains**

14  
15 #Address correspondence to Kurt W Runge, [rungek@ccf.org](mailto:rungek@ccf.org).

16 \*Present address: Biostatistics & Computational Biology, Dana-Farber Cancer Institute, Boston,  
17 MA, USA

18 †Present address: Genetics Branch, National Cancer Institute, National Institutes of Health,  
19 Bethesda, MD, USA

20 J.W and J.R.E contributed equally to this work.

21  
22 Word count for Materials and Methods: 1801 words  
23 Word count for Introduction, Results and Discussion: 4528 words

24

25 **Abstract**

26 Heterochromatin domains play important roles in chromosome biology, organismal development  
27 and aging. In the fission yeast *Schizosaccharomyces pombe* and metazoans, heterochromatin is marked  
28 by histone H3 lysine 9 dimethylation. While factors required for heterochromatin have been identified,  
29 the dynamics of heterochromatin formation are poorly understood. Telomeres convert adjacent  
30 chromatin into heterochromatin. To form a new heterochromatic region in *S. pombe*, an inducible DNA  
31 double-strand break (DSB) was engineered next to 48 bp of telomere repeats in euchromatin, which  
32 caused formation of new telomere and gradual spreading of heterochromatin. However, spreading was  
33 highly dynamic even after the telomere had reached its stable length. The system also revealed the  
34 presence of repeats located at the boundaries of euchromatin and heterochromatin that are oriented to  
35 allow the efficient healing of a euchromatic DSB to cap the chromosome end with a new telomere.  
36 Telomere formation in *S. pombe* therefore reveals novel aspects of heterochromatin dynamics and the  
37 presence of failsafe mechanisms to repair subtelomeric breaks, with implications for similar processes in  
38 metazoan genomes.

39

## 40 **Introduction**

41 A central question in eukaryotic biology is the establishment and maintenance of chromatin  
42 domains, i.e. regions of nucleosomal DNA where the histone composition and spectrum of post-  
43 translational modifications are similar. As embryonic cells differentiate, cell type-specific gene  
44 expression is established in part by the establishment and maintenance of chromatin domains (e.g.  
45 changes in the globin locus in hematopoietic cells, X-chromosome inactivation in females mammals (1,  
46 2)). Chromatin domain reorganization also occurs during tumorigenesis as cells transform into rapidly  
47 growing cancers (3). Heterochromatin domains, marked in part by nucleosomes with di- and tri-  
48 methylation of lysine 9 of histone H3 (H3K9me2 or 3), have been intensely studied for their role in  
49 chromosome biology. Heterochromatin domains are known for silencing gene expression (4), and can  
50 be induced during mammalian cell senescence and aging to form senescence-associated heterochromatin  
51 foci containing H3K9me2 (5–7). Heterochromatin also plays an important role at centromeres, the  
52 chromosomal structure required for chromosome segregation at mitosis, as centromeric chromatin is  
53 flanked by heterochromatin domains that are required for complete function (8–11). While many of the  
54 factors required to maintain heterochromatin have been identified, the dynamics of how heterochromatin  
55 domains assemble and disassemble have remained long-standing, major questions that are only now  
56 being investigated (12–14).

57 Telomeres, the physical ends of chromosomes, are a second chromosomal structure bordered by  
58 heterochromatin. In yeast, humans and many other eukaryotes, telomeres consist of simple DNA  
59 repeats bound by specific proteins. These repeats and their associated proteins provide the first  
60 discovered essential function of telomeres: “that of sealing the end of the chromosome” (15), and  
61 distinguishing it from a Double-Strand Break (DSB)(15, 16). The second essential function is to replace  
62 sequences lost due to incomplete replication, which is accomplished by repeat addition via telomerase  
63 ((17, 18), reviewed in (19)). Telomeres also alter the adjacent nucleosomal chromatin to silence the  
64 expression of nearby genes (20, 21). However, as mutations that eliminate silencing do not cause

65 telomeres to behave as DSBs (20, 22, 23), the essential functions of telomeres act independently of gene  
66 silencing. Heterochromatic gene silencing is associated with the presence of H3K9me2 in humans, flies  
67 and the fission yeast *Schizosaccharomyces pombe* (24), and *S. pombe* telomere-associated chromatin has  
68 the H3K9me2 modification (22, 23, 25). Thus, *S. pombe* telomeres provide an ideal model system to  
69 study heterochromatin and heterochromatin dynamics.

70 A major difficulty that impedes the investigation of heterochromatin domain dynamics is the  
71 large amount of time between the initiation of domain formation and its analysis. Telomeres have been  
72 formed in *S. pombe* by integrating *in vitro* constructed telomeric DNA into genomic sites *in vivo*, but 30  
73 population doublings (PDs) or more must pass between the formation of the new telomere and the  
74 production of enough cells for chromatin and phenotypic analysis (21). Similar approaches requiring  
75 many PDs have followed heterochromatin formation at centromeres and other loci by introducing wild  
76 type genes into mutants defective for heterochromatin assembly (26–29). This approach also converts a  
77 mutant cell to a wild type one, so the levels of cellular chromatin proteins during domain formation are  
78 initially different than wild type cells. Consequently, the kinetics of heterochromatin formation and how  
79 the H3K9me2 modification spreads from the initiating site into the surrounding chromatin is largely  
80 unknown in either wild type or mutant cells. One hypothesis would be that spreading occurs  
81 immediately after the initiating site is created and quickly establishes the final heterochromatin domain  
82 within one or two generations (as with Sir protein spreading in *Saccharomyces cerevisiae* (30–32)).  
83 Alternatively, the formation of the initiation site, e.g. a functional telomere, may allow spreading over  
84 many cell divisions, with the size of the heterochromatin domain gradually increasing over time to form  
85 the final state (as suggested for several histone modifications in (30) and in *S. pombe* in (14)).

86 An inducible telomere formation system would provide an approach to study the kinetics of  
87 heterochromatin formation in wild type cells. Such systems contain a selectable marker followed by an  
88 internal tract of telomere repeats and a unique restriction site or cut site not present elsewhere in the  
89 genome. By placing the restriction enzyme or endonuclease gene under the control of a rapidly

90 inducible promoter, one can induce a DSB in a large population of cells to expose the telomere repeats  
91 at the new chromosome end (33). In *S. cerevisiae* and *S. pombe*, a DSB in the middle of a chromosome  
92 normally leads to DNA degradation and growth inhibition (33–35)(Figure 1A). In contrast, a telomere  
93 formation system in *S. cerevisiae* and mammalian cells has shown that a DSB which exposes telomere  
94 repeats is immediately converted into a short, functional telomere that is not degraded (33, 36–  
95 38)(Figure 1B). The *S. cerevisiae* telomere formation system has yielded important insights into the  
96 roles of telomerase, telomere binding proteins, DNA polymerases and DNA damage proteins in  
97 telomere elongation (reviewed in (39)). However, *S. cerevisiae* lacks the H3K9me2 modification  
98 system, and so its use in modeling the kinetics of heterochromatin spreading that occurs in metazoans is  
99 limited.

100 *S. pombe* is a useful model for studying the H3K9me2 heterochromatin system (40), but a  
101 telomere formation system was previously not feasible owing to the lack of a method to rapidly induce a  
102 DSB. Two different rapidly inducible systems have recently been established by Watson *et al.* using the  
103 HO endonuclease (41) and by ourselves using I-PpoI endonuclease (34). Unfortunately, neither system  
104 was well suited for inducing telomere formation. The HO system uses an *urg1*<sup>+</sup> promoter that is  
105 induced by the addition of uracil, which interferes with the use of the *ura4*<sup>+</sup> selectable marker.  
106 Expression of the *ura4*<sup>+</sup> gene can be selected for or against, which allows the facile monitoring of  
107 expression by cell growth and has been a mainstay of gene silencing studies (21, 42, 43). Our I-PpoI  
108 system avoids this *urg1*<sup>+</sup> limitation by using an anhydrotetracycline (ahTET)-inducible promoter, but I-  
109 PpoI cuts in the rDNA of almost all eukaryotes, so strains bearing mutated rDNA repeats must be used.  
110 We therefore designed a new method to rapidly induce a single DSB in the *S. pombe* genome and used it  
111 to create a telomere formation system. Telomere formation was induced in a population of cells to  
112 follow heterochromatin formation in real-time. While a functional telomere formed immediately, the  
113 H3K9me2 modification spread slowly from the functional telomere over several generations.  
114 Surprisingly, the extent of spreading varied with growth conditions and over time even when the length  
Page 5 of 45

115 of the telomere repeat tracts was constant. Thus, the established heterochromatin domain was  
116 surprisingly dynamic. We also discovered that a DSB in the euchromatin that lacks telomere repeats  
117 was rapidly healed with high efficiency when present near a telomere, in contrast to breaks in the middle  
118 of the chromosome. Therefore, the structure of the *S. pombe* genome contains an unanticipated failsafe  
119 mechanism to rescue telomere loss. These results in *S. pombe* suggest similar novel processes may also  
120 occur at metazoan telomeres and heterochromatin domains.

121

## 122 **Results**

123 **The *S. pombe* telomere formation system.** We first developed an inducible DSB system in *S. pombe*  
124 using the I-SceI homing endonuclease. I-SceI has no endogenous sites in the *S. pombe* genome (44) and  
125 the I-SceI system has the advantage over other DSB inducing systems by leaving the *ura4*<sup>+</sup> selection, a  
126 common telomere silencing marker (21), intact and not requiring special strain backgrounds (34, 41). I-  
127 SceI has the disadvantage of inefficient and slow cutting (45, 46). We therefore designed an I-SceI gene  
128 with preferred *S. pombe* codons (47) and two nuclear localization signals (NLS) at the N-terminus to  
129 enhance expression and genomic DNA cleavage. This I-SceI variant was expressed from a TetR  
130 repressed promoter, which allows expression of the desired gene after addition of ahTET (Figure 2A).  
131 Cutting efficiency was tested in a strain with the I-SceI site at a marker gene near the centromere of  
132 chromosome I, *lysI*<sup>+</sup> (Figure 1C). Most I-SceI sites were cut within 40 minutes of induction of I-SceI  
133 expression (Figure 1C). When plated on inducing medium, the strain expressing I-SceI and containing a  
134 site at *lysI*<sup>+</sup> showed a severe growth defect (Figure 1D), as seen with other strains that continuously  
135 induce a DSB (34, 48–50).

136 Two “proto-telomere” cassettes were created that contain either 48 bp or 0 bp of *S. pombe*  
137 telomere repeat sequence, an I-SceI site and two flanking selectable markers (Figure 2B). Cleavage at  
138 the I-SceI site should expose the telomere repeats and cause a loss of the distal marker and chromosome  
139 end. Consequently, to yield viable cells for analysis, the lost region had to be dispensable and the 48 bp

140 telomere repeats must form a new functional telomere. We therefore chose a site in the 2 kb region 3' to  
141 the *galI*<sup>+</sup> gene on the right end of chromosome II (IIR), because this region is unique in the genome and  
142 borders a 47 kb subtelomere-containing sequence that is repeated at both ends of chromosomes I and II  
143 (44, 51, 52). Cells that have lost most of these subtelomeric sequences are viable (52). In addition,  
144 *galI*<sup>+</sup> and each gene in the 86 kb region 5' to *galI*<sup>+</sup> are not required for growth. Therefore, cleavage in  
145 the 2 kb region 3' to *galI*<sup>+</sup> would cause loss of dispensable chromosomal sequences and allow the  
146 formation of a large heterochromatic domain near the proto-telomere after I-SceI cutting was induced  
147 and still produce viable cells.

148 **A functional short telomere forms after I-SceI cleavage.** Telomere formation was induced in *S.*  
149 *pombe* cells containing the 48 bp proto-telomere by expressing I-SceI and monitoring the fate of the  
150 *ura4*<sup>+</sup> and *hph*<sup>+</sup> proto-telomere fragments by Southern analysis (Figure 3A). The uncut *ura4*<sup>+</sup>-telomere  
151 *repeats-hph*<sup>+</sup> band was visible prior to induction of I-SceI, and was replaced by the I-SceI cleaved *ura4*<sup>+</sup>  
152 and *hph*<sup>+</sup> bands over time. The *ura4*<sup>+</sup> fragment was stable and increased in size and heterogeneity  
153 during the experiment, as expected for the elongation of the exposed 48 bp telomere repeats (Figure 3A).  
154 Elongation was almost certainly by telomerase as sequencing of the telomere fragments revealed that  
155 addition of new telomeric repeats occurred, in all but one case, to the I-SceI cleaved proto-telomere  
156 (Figure 4A), consistent with telomerase-mediated addition events in *S. cerevisiae* and mammalian cells  
157 (38, 53–56). When telomere formation was performed in cells lacking telomerase RNA, the newly  
158 formed telomere was stable but not elongated (Figure 5). In contrast, the *hph*<sup>+</sup> fragment was rapidly  
159 degraded (Figure 3A). Thus, formation of a telomere, the stable structure that “seals” the end of the  
160 chromosome (15), occurs at the earliest time point tested and is independent of telomerase activity.  
161 Following elongation of the telomere repeats for over 50 PDs revealed that the telomere repeat tracts  
162 were stably maintained (Figure 4B) and reached their equilibrium final lengths by ~8 PDs (Figure 4C).  
163 The initial stability and subsequent elongation of the *ura4*<sup>+</sup>-48 bp telomere band therefore show that this  
164 fragment rapidly acquired the essential telomeric functions of end-capping and end-replication after I-

Page 7 of 45

165 SceI cleavage, and behaved the same as short functional telomeres at chromosome ends (e.g. newly  
166 formed *S. cerevisiae* telomeres and telomeres of cells lacking Tel1, MRX or Ku (20, 57)).

167 The I-SceI-induced DSB at the 0 bp proto-telomere had a notably different fate from the 48 bp  
168 proto-telomere. The 0 bp proto-telomere strain displayed rapid cutting as demonstrated by the  
169 disappearance of the *ura4<sup>+</sup>-hph<sup>+</sup>* fragment, and both I-SceI-generated terminal fragments were rapidly  
170 degraded (Figure 3B). Thus, I-SceI cutting at this locus was efficient and both sides of the DSB at the 0  
171 bp proto-telomere were unstable.

172 **The genomic organization of *S. pombe* allows the efficient healing of subtelomeric DSBs.** Double-  
173 strand breaks cause growth arrest in *S. pombe*, *S. cerevisiae*, human cells and other model systems while  
174 telomeres do not ((34, 50), reviewed in (39)). We therefore tested the effect of I-SceI cleavage at  
175 centromeric *lysI<sup>+</sup>* and the subtelomeric 48 bp and 0 bp proto-telomeres. As expected, cleavage at *lysI<sup>+</sup>*  
176 greatly impaired growth (Figure 3C and D). In contrast, cleavage at the 48 bp proto-telomere, which  
177 formed a telomere and lost subtelomeric repeated sequences, showed no detectable growth inhibition.  
178 Surprisingly, cells containing the 0 bp proto-telomere cassette also showed very little growth inhibition,  
179 with ~100% of the cells surviving (Figure 3C and D), even though the *ura4<sup>+</sup>* fragment had been  
180 degraded in these cells (Figure 3B). The mechanism allowing this survival was unclear, because the  
181 DSB occurred in unique sequence, not in the sequences repeated in four telomeres.

182 To determine what process allowed the efficient growth of cells bearing the DSB formed at the 0  
183 bp proto-telomere, we determined the chromosomal structure of three independent survivors.  
184 Phenotypic and genomic characterization revealed that the survivors had lost the *hph<sup>+</sup>* gene and almost  
185 19 kb of DNA internal to the I-SceI cleavage site. The degradation endpoint retained the *DUF999*  
186 *protein family 7* gene (*DUF999-7*), a member of a gene family near the telomeres of chromosomes I and  
187 II, in which all genes are transcribed toward the centromere (Figure 6A). We hypothesized that  
188 nucleolytic degradation from the I-SceI site to the *DUF999 protein family 7* gene would allow  
189 recombination between gene family members to add a functional chromosomal end to IIR (Figure 6B),



190 as recombination between repeats is known to be efficient enough to account for this high level of  
191 survival (58). To test this hypothesis, we determined the sequences adjacent to *DUF999-7* in the  
192 survivor strains and found sequences indicating recombination with *DUF999-8* on IIR or *DUF999-6* on  
193 IIL (Figure 6B and C). As the sequences from the *DUF999-8* and *DUF999-6* genes to their respective  
194 telomeres were almost identical (51, 52), the specific telomere captured by the DSB was not determined.  
195 Therefore, the *S. pombe* genome is structured to rapidly and efficiently heal DSBs near subtelomeres  
196 and maintain cell viability.

197 **Telomere formation initiates silencing of *ura4*<sup>+</sup>.** To test silencing at a newly formed telomere, cells  
198 were assessed for expression of the *ura4*<sup>+</sup> marker. Cells in which transcription of *ura4*<sup>+</sup> is silenced,  
199 such as placing *ura4*<sup>+</sup> near a newly formed telomere, are unable to grow on media lacking uracil (21, 23,  
200 59). Cells were therefore induced for I-SceI expression overnight prior to plating on rich and selective  
201 media (Figure 7A). After induction, strains with the 48 bp proto-telomere grew poorly on medium  
202 containing hygromycin, indicating loss of the 3' *hph*<sup>+</sup> fragment (Figure 3A), or medium lacking uracil.  
203 However, the *ura4*<sup>+</sup> gene was still present and could be amplified from these Ura<sup>-</sup> Hyg<sup>S</sup> colonies (Figure  
204 7B). Amplification and sequencing of the PCR product containing the entire *ura4*<sup>+</sup> gene revealed a wild  
205 type sequence. Therefore, establishing a new telomere silenced expression of the adjacent *ura4*<sup>+</sup> gene.

206 **The H3K9me2 heterochromatin mark spreads gradually after telomere formation, and is highly**  
207 **variable at full length telomeres.** To determine if *ura4*<sup>+</sup> silencing was due to heterochromatin  
208 formation, we tested whether levels of the heterochromatin specific histone modification, H3K9me2,  
209 were altered near the established telomere by ChIP-qPCR. H3K9me2 levels were determined using  
210 primers that amplify *ura4*<sup>+</sup>, *gal1*<sup>+</sup> or chromosomal loci internal to the proto-telomere at varying  
211 distances up to 93 kb from the break (Figure 8A, red bars). We found that cells containing the uncut 48  
212 bp proto-telomere had a localized peak of H3K9me2 near the insertion site, while the fully formed  
213 telomere showed a large increase of H3K9me2 spreading (Figure 8A). Spreading of the H3K9me2 mark  
214 was under nutritional control, as more spreading was observed in cells grown in rich medium than

215 synthetic medium, even though telomere size was nearly identical under both conditions (Figure 8B).  
216 Therefore, similar to changes in *Drosophila* position effect variegation that respond to temperature (60)  
217 and the reversible silencing of *S. pombe* subtelomere-adjacent genes that are expressed in sporulation  
218 medium (25), heterochromatin domains in *S. pombe* also respond to environmental conditions. In cells  
219 with the 0 bp proto-telomere and no I-SceI gene, no such enrichment of H3K9me2 was found (Figure  
220 8C). The localized H3K9me2 peak in the uninduced cells with the 48 bp proto-telomere did not spread  
221 into the distal end (Figure 8D).

222 To understand the relationship between the formation of a functional telomere and the  
223 establishment of the telomeric heterochromatin domain, we performed a kinetic analysis of H3K9me2  
224 levels while the new telomere was forming. Upon induction of telomere formation, heterochromatin  
225 spreading was monitored in cells grown continuously for 8 PDs. To examine cells at longer time points  
226 in the absence of cells that have healed the I-SceI cut to retain the *hph*<sup>+</sup> fragment and subtelomere  
227 (Figure 4C), cells from PD 2 were used to isolate single, Hyg<sup>S</sup> colonies that were subsequently cultured  
228 and analyzed (Figure 9A).

229 From 0 to 8 PDs, the H3K9me2 level gradually increased and peaked at 9 kb from the cut site  
230 (Figure 9C-F and Figure S2A-C) and telomeres were elongated gradually (Figure 3A and 9O). At the 1  
231 PD time point, cells had short functional telomeres as the *ura4*<sup>+</sup> telomeric fragment was stable and  
232 slightly elongated (Figure 3A and 9O), but H3K9me2 level barely increased (Figure 9C and D). At 2  
233 and 8 PDs, the size of heterochromatin slowly increased toward the centromere (Figure 9C, E and F) and  
234 telomere length reached its equilibrium state at 8 PDs (Figure 9O).

235 Surprisingly, from PDs 34 to 87, independently formed telomeres from four similar induction  
236 assays showed differences in the amount of heterochromatin at different times in the presence of  
237 constant telomere length. These experiments showed spreading of the level of H3K9me2 to a domain of  
238 similar size (Figure 9G and K), and H3K9me2 levels were very similar at the most internal loci at all  
239 time points. However, one line (Figure 9G-J) showed a peak of heterochromatin at 19 kb from the new

240 telomere that was nearly constant from 34 to 60 PDs, followed by a significant increase by 87 PDs. A  
241 second line showed an increase at 60 PDs that was maintained at 87 PDs (Figure S2D). In contrast, the  
242 remaining two lines (Figure 9K-N and S2E) showed a similar internal peak that increased from 34 to 60  
243 PDs, followed by a significant decrease by 87 PDs. Southern analysis revealed that telomere lengths in  
244 different formation experiments were indistinguishable at all of these time points (Figure 9O and P).  
245 Therefore, spreading of the telomeric H3K9me2 mark was dynamic, even though the telomere  
246 maintained a constant repeat tract size during this time.

247

## 248 **Discussion**

249 We have constructed the first inducible *S. pombe* telomere formation system, and used it to show  
250 that telomeric regions have unexpected properties in healing DSBs and in the kinetics of  
251 heterochromatin domain formation and spreading. While inducing a DSB near the middle of the  
252 chromosome arm caused a significant growth inhibition, DSBs in the subtelomeric region at the 0 bp or  
253 48 bp proto-telomere did not (Figure 3C and D). The 0 bp proto-telomere lacking any telomere repeats  
254 showed DNA degradation on both sides of the DSB (Figure 3B), and revealed a backup mechanism to  
255 restore telomere function by recombination between a family of subtelomeric repetitive elements (Figure  
256 6). In contrast, the 48 bp proto-telomere with telomere repeats on the centromeric-side of the DSB was  
257 stable and a substrate for telomere repeat addition, behavior identical to a functional short telomere (33,  
258 52, 61)(Figure 3A, 4 and 9O). Even though formation of a functional telomere was rapid, establishing  
259 the telomere-dependent heterochromatin domain was much slower. The H3K9me2 domain spreads  
260 gradually from 0 to 8 PDs, when telomere length reaches equilibrium state. The slow spreading of  
261 heterochromatin is consistent with the facts that the essential telomere functions in chromosome stability  
262 are independent of heterochromatin (22, 57), and that this heterochromatin domain is a secondary  
263 consequence of telomere formation. The slow spread of the heterochromatin domain raises the  
264 possibility that chromatin domain formation in other biological contexts (e.g. metazoan development,

265 tumorigenesis, senescence) also requires several cell divisions. After telomere repeat tracts reach their  
266 final length, the size of the H3K9me2 domain remains dynamic, indicating that this extended spreading  
267 is independent of telomere length.

268         The backup mechanism to rescue telomere function in response to a subtelomeric DSB most  
269 likely reflects the similarities between the genome structure of *S. pombe* and metazoans. The three  
270 nuclear chromosomes of *S. pombe* have complex subtelomeric regions (51), with repeats oriented in a  
271 way that allowed recombination to attach or copy a functional telomere to the broken chromosome end  
272 (Figure 6). Mammalian genomes also contain a large number of repeats, and small deletions at the  
273 border between telomeric euchromatin and heterochromatin are unlikely to cause a phenotype in diploid  
274 cells, in contrast to large telomeric deletions that have developmental consequences (61–63). The *S.*  
275 *pombe* results therefore suggest that a direct examination of induced DSBs near the border of the  
276 mammalian heterochromatic subtelomere may reveal a similar mechanism for rescuing telomere  
277 function.

278         The newly formed *S. pombe* telomere revealed an unusual heterochromatin domain compared to  
279 the uncleaved 48 bp proto-telomeres. The uncleaved 48 bp proto-telomere showed only a peak of  
280 H3K9me2 levels that were centered at the 48 bp telomere repeats (uninduced in Figure 8 and 9C),  
281 consistent with the internal telomeric repeats initiating low levels of silencing (22, 23). In contrast, the  
282 established telomere with a functional chromosome end formed an internal heterochromatin domain that  
283 peaked from 9 to 26 kb from the telomere (Figure 9C, G, K). The reason for this internal peak, as  
284 opposed to a peak immediately adjacent to the telomere repeats, is unknown. The location of this  
285 internal peak was different in cells grown in rich media versus synthetic media (Figure 8A), suggesting  
286 that the peak location is not completely sequence dependent. This *S. pombe* telomere formation system  
287 will thus provide a useful tool for future studies to examine the *cis*- and *trans*-acting factors that regulate  
288 the positioning of this heterochromatin peak.

289           The telomere formation system revealed a slow and dynamic spreading of the telomeric  
290 heterochromatin domain that was not predicted by previous studies. In recent work where a synthetic *S.*  
291 *pombe* heterochromatin domain was established by conditionally tethering the H3K9 methyltransferase  
292 to an expressed gene, release of the tethered methyltransferase caused the H3K9me2 mark to be lost a  
293 few hours later (~1-2 PDs)(12, 13), much faster than the 8 PDs (48 h) required to form the internal  
294 heterochromatin peak (Figure 9C). Assembly of a transcriptionally silenced chromatin in *S. cerevisiae*,  
295 which does not involve H3K9me2, has been monitored and also forms at a much faster rate.  
296 Overexpression of a silencing protein unique to the budding yeast, Sir3, in wild type cells extended  
297 existing Sir3-containing chromatin domains (30–32). An independent approach that used chemical  
298 inhibition of silencing and followed its establishment after the inhibitor was withdrawn (64) showed that  
299 Sir3 silent chromatin was significantly extended or re-established in these studies within ~4 hours (~1-2  
300 PDs). Complete modification of the histones as a consequence of Sir3 spreading, however, did require  
301 additional population doublings (30). In contrast to these events in yeasts, formation of a synthetic  
302 heterochromatin domain in murine cells from a tethered silencing factor took much longer (~5 days) to  
303 form the steady-state 10 kb heterochromatin domain (65). While the slower kinetics could be a  
304 consequence of the murine tethering system, the *S. pombe* telomere formation results suggest that the  
305 assembly of H3K9me2-dependent heterochromatin domains is an intrinsically slower process compared  
306 to its disassembly.

307           The telomeric H3K9me2 chromatin domain formed in two distinct phases following telomere  
308 formation in a wild type strain background. The first was the spreading over 8 PDs to form the domain  
309 where H3K9me2 peaks near 9 kb from the telomere (Figure 10), even though a substantial fraction of  
310 the telomeres were already normal length by 2 PDs (Figure 9O). This mechanism is consistent with  
311 current models of spreading (24, 40), in which the extension of the H3K9me2 modification from its  
312 nucleation site (e.g. the newly formed telomere) can only occur in S-phase after DNA replication when  
313 new chromatin is formed, then S-phase exit may limit the extent of heterochromatin extension for that

314 cycle. The second phase occurs during continued propagation of cells with fully elongated telomeres,  
315 where the internal peak of H3K9me2 chromatin from 9 to 26 kb can significantly increase or decrease.  
316 How these changes occur is unknown, and could reflect methylation of the Lys9 residues on both H3  
317 amino termini in the histone octamer or the presence of a subpopulation of cells in the culture that had  
318 not formed this heterochromatin domain. The internal peak of H3K9me2 chromatin may be indicative  
319 of a cryptic enhancer of H3K9me2 modification that is activated by this modification spreading from the  
320 telomere. In these hypotheses, the changes in H3K9me2 levels occur slowly in continuously growing  
321 cultures, consistent with the assembly of new chromatin every new S-phase (Figure 10), although the  
322 active replacement of nucleosomes by chromatin remodeling factors outside of S-phase cannot be ruled  
323 out.

324         Recently, Obersriebnig *et al.* examined the spreading of gene silencing and the H3K9me2  
325 modification in the *S. pombe* silent mating type region after reintroduction of the *clr4<sup>+</sup>* gene into a *clr4Δ*  
326 cell by mating. Silencing at different distances from the initiation site was monitored by following the  
327 loss of expression of fluorescent protein genes for the first several generations, and H3K9me2 spreading  
328 was followed ~30 divisions later by ChIP (14). Numerical modeling of the rates of spreading, assuming  
329 that fluorescent protein gene silencing was due to H3K9me2 spreading, could be divided into global and  
330 local effects that produced outcomes similar to their experimental observations. Spreading in the first  
331 few cell divisions was consistent with a linear spreading from the initiator in the silent mating type  
332 region (the *cenH* repeat), similar to spreading of the H3K9me2 mark from our newly formed telomere.  
333 Despite the similarities of the two systems in these initial stages of spreading, it is important to note that  
334 the silent mating type region is a highly specialized and well-studied structure containing initiators,  
335 enhancers and boundary elements that both promote and confine heterochromatin to a defined region to  
336 permanently extinguish gene expression as an essential part of the fission yeast life cycle (66–68). The  
337 newly formed telomere does not contain any known elements of this type, and may be more similar to  
338 the heterochromatin domain formation that occurs during development or senescence that encompasses

339 genes that are expressed in difference cell types (5–7, 25). Additional work on the newly formed  
340 telomeric H3K9me2 domain will therefore be required before a detailed comparison with the silent  
341 mating type region can be made.

342         The slow extension of the H3K9me2 modification from its nucleation site (e.g. the newly formed  
343 telomere) has functional consequences for the formation of larger chromatin domains, which may  
344 require many cell cycles. The rate of transition from one cellular state to another during development or  
345 aging would be slowed by formation of a chromatin domain. This rate may well be increased early in  
346 development as oocytes have large amounts of maternally deposited histones and histone modifying  
347 enzymes (69, 70), and the increased levels of chromatin components and modifying enzymes could  
348 increase the kinetics of chromatin domain formation. In somatic cells where the modifiers may be at  
349 lower levels, the kinetics of domain formation would be slower and may impede aging and  
350 tumorigenesis. The *S. pombe* telomere formation system will provide an ideal model for testing these  
351 ideas and identifying the rate-limiting components in chromatin domain formation with broader  
352 implications for metazoans.

353

## 354 **Materials and Methods**

### 355 **Strains and Media**

356 All *S. pombe* strains used in this study are shown in Supplementary file 3. Selection for strains  
357 containing telomere cassettes was performed in Edinburgh Minimal Media with sodium glutamate  
358 (EMMG) substituted for ammonium chloride without uracil and with appropriate amino acid  
359 supplements and 100 µg/ml Hygromycin B Gold (InvivoGen)(71). Non-selective growth of strains  
360 bearing the telomere cassettes was done in EMMG with uracil and other appropriate amino acid  
361 supplements and without hygromycin. Preparation of 10 mM anhydrotetracycline stock and plates was  
362 performed as in (34). 5-FOA plates are Yeast Nitrogen Base plates with 1 mg/ml 5-FOA (Toronto  
363 Research Chemicals, Inc.)(72) and with the appropriate supplements. All recombinant DNA procedures

364 were carried out in NEB 5-alpha (New England Biolabs) and TOP10 (Life Technologies) competent  
365 cells.

366

### 367 **I-SceI Expression Vector**

368 I-SceI is produced from a synthetic gene with optimized *S. pombe* codons (47) and expressed as a  
369 protein with two N-terminal SV40 nuclear localization signals (NLS) fused to I-SceI. I-SceI expression  
370 is under the Cauliflower Mosaic Virus 35S promoter (CaMV35Sp), which is regulated by the  
371 tetracycline repressor (TetR). The TetR protein is produced from the *adh1*<sup>+</sup> promoter in the same  
372 cassette as I-SceI (73). pFA-LEU2-I-SceI was produced by a 5-part recombination cloning in *S.*  
373 *cerevisiae*, rescued to bacteria, and verified by DNA sequencing (74). An I-SceI site on the vector  
374 backbone was removed by site-directed mutagenesis. Additional cloning details are available upon  
375 request. The vector and its sequence have been deposited with Addgene.

376

### 377 **Telomere Cassette**

378 The most terminal unique region of *S. pombe* Chr IIR was found to be the 2 kb region 3' of the *gal1*<sup>+</sup>  
379 gene 3'-UTR (44). The proto-telomere cassette containing *ura4*<sup>+</sup>, 0 or 48 bp of telomere seeding  
380 sequence, and the *hph*<sup>+</sup> gene encoding hygromycin resistance was constructed in the vector pRS315 by a  
381 5-part recombination cloning in *S. cerevisiae*. The junctions between DNA fragments were verified by  
382 colony PCR and the plasmids were rescued to bacteria and sequenced. Additional cloning details are  
383 available upon request. The vector and its sequence have been deposited with Addgene.

384

### 385 **Construction of the *I-SceI-lys1*<sup>+</sup> Allele**

386 The I-PpoI site in the plasmid pSS23 (34) was replaced by the I-SceI site by standard cloning.  
387 Transformation, selection for the hygromycin resistance gene *hph*<sup>+</sup>, and confirmation of integration of I-  
388 SceI at *lys1*<sup>+</sup> in *S. pombe* was done as before (34).



389

### 390 **Induction of I-SceI.**

391 Cells containing the telomere cassettes were grown under selection overnight and diluted to a final  
392 volume of 230 ml at  $5.5 \times 10^6$  cells/ml in non-selective media and grown for 3.75 hours. Untreated cells  
393 ( $3-5 \times 10^8$ ) were removed and pelleted, washed once with sterile water and frozen at  $-80^\circ\text{C}$ .  
394 Anhydrotetracycline (ahTET) was then added to a final concentration of  $9 \mu\text{M}$ . Cells then were  
395 collected at various time points and pelleted, washed, and frozen as above. Genomic DNA was  
396 extracted (75) from the frozen pellets for Southern analysis as below. I-SceI cleavage at *lysI*<sup>+</sup> was  
397 performed and analyzed as in (34), except ahTET was added at a final concentration of  $9 \mu\text{M}$ .

398

### 399 **Southern Blot Analysis**

400 Cells ( $3-5 \times 10^8$ ) were collected at each time point and used to prepare genomic DNA (75). Genomic  
401 DNA ( $5 \mu\text{g}$ ) was digested with 20 units of ScaI and analyzed via Southern blot with <sup>32</sup>P-labeled probes  
402 produced by PCR with u4ScaProbe\_S + u4ScaProbe\_AS or SV40ScaProbe\_S + SV40ScaProbe\_AS  
403 (Supplementary file 4). Purified PCR product ( $50 \text{ ng}$ ) was denatured and treated with 10 units of  
404 Klenow (New England Biolabs) in the presence of primers (final concentration  $0.25 \mu\text{M}$ ) and  $100 \mu\text{Ci}$  of  
405 alpha-<sup>32</sup>P-dATP ( $3000-6000 \text{ Ci/mmol}$ , PerkinElmer) in a  $40 \mu\text{l}$  reaction at  $37^\circ\text{C}$  for 30 min. The probe  
406 was purified in a G-25 spin column and  $2-10 \times 10^6$  counts per minute (cpm) was used in Southern blot  
407 hybridization. Pre-hybridization and hybridization performed with PerfectHyb (Sigma) as described  
408 (76). Stripping of membrane performed in buffer containing 0.5% SDS and  $0.1 \times \text{SSC}$  and heated to  
409  $100^\circ\text{C}$  for  $2 \times 15$  minutes.

410

### 411 **Telomere PCR and Sequencing**

412 Telomere PCR was performed as previously described (76, 77) with primers u4-teloPCR-1S and  
413 BamHI-G<sub>18</sub> (Supplementary file 4) using genomic DNA from 1, 8 and 50 PD(s). Cells from 8 PDs (48

414 h) were struck for single colony and tested for hygromycin sensitivity. Two hygromycin-sensitive  
415 colonies were used for this analysis as 50 PDs clone #1 and #2. The purified PCR products were cloned  
416 into TOPO vector (Life Technologies) and sequenced using M13F or M13R primers (Supplementary  
417 file 4) at the Lerner Research Institute Genomics Core.

418

#### 419 **ahTET Plating Assay**

420 The spot test assay was performed by spotting 5-fold serial dilutions onto the indicated plates as in  
421 Sunder *et al.* (34). Strains containing proto-telomere constructs were grown without ahTET and under  
422 selection for the telomere cassette, and then plated on non-selective EMMG with and without ahTET.  
423 For the quantitative plating assay, cells were plated onto non-selective EMMG with or without ahTET at  
424 300 cells per plate and grown for 7 days. The average number of colonies from three individual plates  
425 with ahTET was normalized to that from plates without ahTET for strains containing the I-SceI gene.  
426 This was then normalized to the same ratio of control cells without the I-SceI gene. Statistical  
427 comparisons were performed using GraphPad Prism version 6.0 (GraphPad Software).

428

#### 429 **Selection of 0 bp Survivors**

430 *S. pombe* cells containing the 0 bp proto-telomere were induced with ahTET (9  $\mu$ M final concentration)  
431 and grown overnight in liquid EMMG. Cells were struck for single colonies on rich media and grown  
432 for 3 days. The resulting colonies were tested for sensitivity to hygromycin (100  $\mu$ g/ml). DNA was  
433 extracted from 3 separate isolates that were sensitive to hygromycin and analyzed via PCR using  
434 primers listed in Supplementary file 4 to determine which sequences had been deleted after initiating the  
435 DSB at the 0 bp proto-telomere.

436

#### 437 **Mapping of 0 bp Survivors**

438 The recombination site was determined using inverse-circle PCR. Briefly, genomic DNA from 3  
439 separate isolates (5 µg) was digested with 20 units of *EcoRI* for 16 h at 37°C followed by inactivation at  
440 65°C for 20 min. A portion of the digestion (1 µg) was diluted in a ligation reaction to a total volume of  
441 200 µl using 40 units of T4 DNA Ligase (New England Biolabs) for 16 h at 18°C. The ligation was  
442 ethanol precipitated and resuspended in 10 µl of 10 mM Tris-1 mM EDTA, pH 8.0. Half of the product  
443 was amplified with primers 07c-2-AS-rv&compl + BsrDI-map-AS and the product was sequenced with  
444 the same primers (Supplementary file 4). The resulting sequence was subjected to BLAST analysis and  
445 aligned to the *S. pombe* genome (44).

446

#### 447 **Silencing Assay**

448 Cells containing the telomere cassettes were grown under selection overnight. Cells were then  
449 transferred to 5 ml of non-selective media at a concentration of  $5.5 \times 10^5$  cells/ml and allowed to recover  
450 for 3.75 h before addition of ahTET (9 µM final concentration). Cells ( $1 \times 10^6$ ) were collected before  
451 and after overnight induction with ahTET and  $5 \times 10^5$  cells were plated in five-fold serial dilutions on  
452 plates with the media indicated and grown for 3 or 4 days at 30°C.

453

#### 454 **Analysis of *ura4*<sup>+</sup> in the Ura<sup>-</sup>, 5-FOA Resistant Colonies**

455 Single colonies resistant to 5-FOA (5-fluoro-orotic acid, which Ura4 converts to a poison) after  
456 induction of I-SceI were tested for hygromycin sensitivity on rich media. DNA was extracted and  
457 analyzed for the presence of *ura4*<sup>+</sup> by PCR using 5 PRIME HotMaster *Taq* DNA Polymerase according  
458 to manufacturer's instructions and primers ura4ChIP\_F + ura4ChIP\_R (Supplementary file 4) and an  
459 extension time of 1.0 min for 25 cycles (MJ Research PTC 200 Thermal Cycler). A positive control for  
460 all PCRs was performed in parallel using primers SPBPB2B2.07c-ChIP-S + SPBPB2B2.07c-ChIP-AS  
461 (Supplementary file 4) to amplify the *DUF999* protein family 7 gene and produced a product in all  
462 reactions.

463

#### 464 **ChIP Assay**

465 Cells in 300 ml at 0.8-1.2 OD<sub>600</sub> were cross-linked with 1% formaldehyde, and washed twice with cold  
466 HBS buffer (50 mM HEPES-NaOH pH 7.5, 140 mM NaCl). Cell pellets were stored at -80°C. For a  
467 saturated culture, cells were diluted to the above OD<sub>600</sub> for cross-linking. At 2 PDs, cells were struck for  
468 single colony on rich media for 3-4 days. The resulting colonies were tested for sensitivity to  
469 hygromycin (100 µg/ml). A hygromycin-sensitive colony was inoculated in non-selective EMMG with  
470 ahTET and cells from serial dilutions were collected for analysis. All subsequence steps were  
471 performed at 4°C. Cell pellets were resuspended in ChIP-lysis buffer (78) and lysed using mechanical  
472 disruption by beads-beater (Bio Spec Mini-Beadbeater-16) with 0.5 mm glass beads (Biospec  
473 11079105) using 4 cycles of 45 sec followed by 60 sec on ice. The lysate was sonicated for 10 cycles on  
474 maximum power (30 sec ON and 59 sec OFF) in a Diagenode Bioruptor XL with sample tubes soaked  
475 in an ice water bath. Solubilized chromatin protein (2-4 mg) was used for each ChIP while 5 µl was  
476 saved as Input. Antibodies (2 µg) against H3K9me2 (Abcam ab1220) or total H3 (Abcam ab1791) were  
477 added to lysate and incubated while rocking for 4 h at 4°C. Dynabeads Protein G (50 µl, Life  
478 Technologies) was then added to lysate for rocking overnight at 4°C. Beads were washed with ChIP  
479 lysis buffer, ChIP lysis buffer with 500 mM NaCl, Wash buffer and TE buffer (10 mM Tris, 1 mM  
480 EDTA pH 7.5) successively (78). Beads were then resuspended in 145 µl of TES (1 × TE with 1%  
481 SDS). Supernatant (120 µl) was recovered and incubated in a Thermomixer at 65°C, 1000 rpm  
482 overnight to reverse cross-linking. For Input samples, TES buffer (115 µl) was added and incubated in  
483 the Thermomixer with the ChIP samples. Samples were treated with RNaseA and ProteinaseK, and  
484 purified by QIAgen PCR purification column (79). All time points from the same induction assay were  
485 processed for ChIP assay at the same time.

486

#### 487 **qPCR Analysis for ChIP**

488 Input samples were diluted to 1/100 with ddH<sub>2</sub>O while beads-only-ChIP, H3-ChIP and H3K9me2-ChIP  
489 samples were diluted to 1/10. Template DNA (4 µl) were added to 5 µl of Roche LightCycler 480  
490 SYBR Green I Master (2X) and primers were added to a final concentration of 0.6 µM for a 10 µl total  
491 reaction volume. Each sample was run in triplicate on the same 384-well PCR plate (Roche LightCycler  
492 480 Multiwell Plate 384, clear) in a Roche LightCycler 480. Each ChIP assay was performed at least  
493 three times independently. H3K9me2 levels were normalized to the total H3 levels at each locus (80–  
494 82), and each ratio was normalized to *act1*<sup>+</sup> control locus in the same ChIP (83). Fold enrichments (*FE*)  
495 were calculated using the delta-delta-Cq method for each locus at each time point, as followed for a  
496 locus of interest (*loi*),

$$497 \quad FE_{loi} = \frac{2^{-[(Cq_{H3K9me2}-A)-(Cq_{beads}-A)]}}{2^{-[(Cq_{H3}-A)-(Cq_{beads}-A)]}}$$

498 where

$$499 \quad A = Cq_{Input} - \log_2(DilutionFactor).$$

500 Then *FE* of the *loi* was normalized to *FE* of *act1*<sup>+</sup> to generate the final Fold Enrichment of H3K9me2 at  
501 each locus.

502

### 503 Acknowledgements

504 We would like to thank Dr. Steven Sanders for use of strains and materials, all the members of the  
505 Runge lab, and Drs. Bibo Li, Derek Taylor, Peter Harte and Hung-Ying Kao for discussion and critical  
506 comments on the manuscript. This work was supported by National Institutes of Health Grants  
507 R01GM050752 and R01AG019966 and National Science Foundation Grant 1516220 to KWR. KLB  
508 was supported by National Institutes of Health Grants R01HL055666 and R01HL081093.

509

510 **References:**

- 511 1. Chaligné R, Heard E. 2014. X-chromosome inactivation in development and cancer. *FEBS Lett*  
512 588:2514–22.
- 513 2. Lunyak V V., Rosenfeld MG. 2008. Epigenetic regulation of stem cell fate. *Hum Mol Genet*  
514 17:R28-36.
- 515 3. Sharma S, Kelly TK, Jones PA. 2010. Epigenetics in cancer. *Carcinogenesis* 31:27–36.
- 516 4. Lodish H, Berk A, Matsudaira P, Kaiser CA, Krieger M, Scott MP, Zipursky SL, Darnell J. 2007.  
517 *Molecular Cell Biology*, 6th ed. W.H. Freeman and Company.
- 518 5. Funayama R, Ishikawa F. 2007. Cellular senescence and chromatin structure. *Chromosoma*  
519 116:431–40.
- 520 6. Rai TS, Adams PD. 2012. Lessons from senescence: Chromatin maintenance in non-proliferating  
521 cells. *Biochim Biophys Acta* 1819:322–31.
- 522 7. Corpet A, Stucki M. 2014. Chromatin maintenance and dynamics in senescence: a spotlight on  
523 SAHF formation and the epigenome of senescent cells. *Chromosoma* 123:423–36.
- 524 8. Alper BJ, Lowe BR, Partridge JF. 2012. Centromeric heterochromatin assembly in fission yeast--  
525 balancing transcription, RNA interference and chromatin modification. *Chromosom Res* 20:521–  
526 34.
- 527 9. Ekwall K. 2007. Epigenetic control of centromere behavior. *Annu Rev Genet* 41:63–81.
- 528 10. Pidoux AL, Allshire RC. 2005. The role of heterochromatin in centromere function. *Philos Trans*  
529 *R Soc Lond B Biol Sci* 360:569–79.
- 530 11. Pidoux AL, Allshire RC. 2004. Kinetochores and heterochromatin domains of the fission yeast  
531 centromere. *Chromosome Res* 12:521–34.
- 532 12. Audergon PNCB, Catania S, Kagansky A, Tong P, Shukla M, Pidoux AL, Allshire RC. 2015.  
533 *Epigenetics*. Restricted epigenetic inheritance of H3K9 methylation. *Science* 348:132–5.
- 534 13. Rangunathan K, Jih G, Moazed D. 2015. *Epigenetics*. Epigenetic inheritance uncoupled from

- 535 sequence-specific recruitment. *Science* 348:1258699.
- 536 14. Obersriebnig MJ, Pallesen EMH, Sneppen K, Trusina A, Thon G. 2016. Nucleation and spreading  
537 of a heterochromatic domain in fission yeast. *Nat Commun* 7:11518.
- 538 15. Muller HJ. 1938. The remaking of chromosomes. *Collect Net* 8:181–195, 198.
- 539 16. McClintock B. 1941. The Stability of Broken Ends of Chromosomes in *Zea Mays*. *Genetics*  
540 26:234–82.
- 541 17. Watson JD. 1972. Origin of concatemeric T7 DNA. *Nat New Biol* 239:197–201.
- 542 18. Olovnikov AM. 1973. A theory of marginotomy. *J Theor Biol* 41:181–190.
- 543 19. Smogorzewska A, de Lange T. 2004. Regulation of telomerase by telomeric proteins. *Annu Rev*  
544 *Biochem* 73:177–208.
- 545 20. Gottschling DE, Aparicio OM, Billington BL, Zakian VA. 1990. Position effect at *S. cerevisiae*  
546 telomeres: reversible repression of Pol II transcription. *Cell* 63:751–62.
- 547 21. Nimmo ER, Cranston G, Allshire RC. 1994. Telomere-associated chromosome breakage in  
548 fission yeast results in variegated expression of adjacent genes. *EMBO J* 13:3801–11.
- 549 22. Castillo AG, Pidoux AL, Catania S, Durand-Dubief M, Choi ES, Hamilton G, Ekwall K, Allshire  
550 RC. 2013. Telomeric repeats facilitate CENP-A(Cnp1) incorporation via telomere binding  
551 proteins. *PLoS One* 8:e69673.
- 552 23. Kanoh J, Sadaie M, Urano T, Ishikawa F. 2005. Telomere binding protein Taz1 establishes Swi6  
553 heterochromatin independently of RNAi at telomeres. *Curr Biol* 15:1808–19.
- 554 24. Elgin SCR, Grewal SIS. 2003. Heterochromatin: silence is golden. *Curr Biol* 13:R895-8.
- 555 25. Hansen KR, Burns G, Mata J, Volpe TA, Martienssen RA, Bähler J, Thon G. 2005. Global effects  
556 on gene expression in fission yeast by silencing and RNA interference machineries. *Mol Cell Biol*  
557 25:590–601.
- 558 26. Hall IM, Shankaranarayana GD, Noma K-I, Ayoub N, Cohen A, Grewal SIS. 2002.  
559 Establishment and maintenance of a heterochromatin domain. *Science* 297:2232–7.

- 560 27. Partridge JF, DeBeauchamp JL, Kosinski AM, Ulrich DL, Hadler MJ, Noffsinger VJP. 2007.  
561 Functional separation of the requirements for establishment and maintenance of centromeric  
562 heterochromatin. *Mol Cell* 26:593–602.
- 563 28. Sadaie M, Iida T, Urano T, Nakayama J-I. 2004. A chromodomain protein, Chp1, is required for  
564 the establishment of heterochromatin in fission yeast. *EMBO J* 23:3825–35.
- 565 29. Schalch T, Job G, Noffsinger VJ, Shanker S, Kuscu C, Joshua-Tor L, Partridge JF. 2009. High-  
566 affinity binding of Chp1 chromodomain to K9 methylated histone H3 is required to establish  
567 centromeric heterochromatin. *Mol Cell* 34:36–46.
- 568 30. Katan-Khaykovich Y, Struhl K. 2005. Heterochromatin formation involves changes in histone  
569 modifications over multiple cell generations. *EMBO J* 24:2138–49.
- 570 31. Radman-Livaja M, Ruben G, Weiner A, Friedman N, Kamakaka R, Rando OJ. 2011. Dynamics  
571 of Sir3 spreading in budding yeast: secondary recruitment sites and euchromatic localization.  
572 *EMBO J* 30:1012–26.
- 573 32. Martins-Taylor K, Dula M Lou, Holmes SG. 2004. Heterochromatin spreading at yeast telomeres  
574 occurs in M phase. *Genetics* 168:65–75.
- 575 33. Diede SJ, Gottschling DE. 1999. Telomerase-mediated telomere addition in vivo requires DNA  
576 primase and DNA polymerases alpha and delta. *Cell* 99:723–33.
- 577 34. Sunder S, Greeson-Lott NT, Runge KW, Sanders SL. 2012. A new method to efficiently induce a  
578 site-specific double-strand break in the fission yeast *Schizosaccharomyces pombe*. *Yeast* 29:275–  
579 91.
- 580 35. Harrison JC, Haber JE. 2006. Surviving the breakup: the DNA damage checkpoint. *Annu Rev*  
581 *Genet* 40:209–35.
- 582 36. Ribeyre C, Shore D. 2012. Anticheckpoint pathways at telomeres in yeast. *Nat Struct Mol Biol*  
583 19:307–13.
- 584 37. Michelson RJ, Rosenstein S, Weinert T. 2005. A telomeric repeat sequence adjacent to a DNA



- 585 double-stranded break produces an antieckpoint. *Genes Dev* 19:2546–59.
- 586 38. Lee SS, Bohrson C, Pike AM, Wheelan SJ, Greider CW. 2015. ATM Kinase Is Required for  
587 Telomere Elongation in Mouse and Human Cells. *Cell Rep* 13:1623–1632.
- 588 39. Ribeyre C, Shore D. 2013. Regulation of telomere addition at DNA double-strand breaks.  
589 *Chromosoma* 122:159–73.
- 590 40. Wang J, Lawry ST, Cohen AL, Jia S. 2014. Chromosome boundary elements and regulation of  
591 heterochromatin spreading. *Cell Mol Life Sci* 71:4841–52.
- 592 41. Watson AT, Werler P, Carr AM. 2011. Regulation of gene expression at the fission yeast  
593 *Schizosaccharomyces pombe* *urg1* locus. *Gene* 484:75–85.
- 594 42. Grewal SS, Klar AJ. 1997. A recombinationally repressed region between *mat2* and *mat3* loci  
595 shares homology to centromeric repeats and regulates directionality of mating-type switching in  
596 fission yeast. *Genetics* 146:1221–1238.
- 597 43. Thon G, Bjerling P, Bunner C, Verhein-Hansen J. 2002. Expression-state boundaries in the  
598 mating-type region of fission yeast. *Genetics* 161:611–622.
- 599 44. Wood V, Gwilliam R, Rajandream M-A, Lyne M, Lyne R, Stewart A, Sgouros J, Peat N, Hayles  
600 J, Baker S, Basham D, Bowman S, Brooks K, Brown D, Brown S, Chillingworth T, Churcher C,  
601 Collins M, Connor R, Cronin A, Davis P, Feltwell T, Fraser A, Gentles S, Goble A, Hamlin N,  
602 Harris D, Hidalgo J, Hodgson G, Holroyd S, Hornsby T, Howarth S, Huckle EJ, Hunt S, Jagels K,  
603 James K, Jones L, Jones M, Leather S, McDonald S, McLean J, Mooney P, Moule S, Mungall K,  
604 Murphy L, Niblett D, Odell C, Oliver K, O’Neil S, Pearson D, Quail MA, Rabinowitsch E,  
605 Rutherford K, Rutter S, Saunders D, Seeger K, Sharp S, Skelton J, Simmonds M, Squares R,  
606 Squares S, Stevens K, Taylor K, Taylor RG, Tivey A, Walsh S, Warren T, Whitehead S,  
607 Woodward J, Volckaert G, Aert R, Robben J, Grymonprez B, Weltjens I, Vanstreels E, Rieger M,  
608 Schäfer M, Müller-Auer S, Gabel C, Fuchs M, Düsterhöft A, Fritzc C, Holzer E, Moestl D,  
609 Hilbert H, Borzym K, Langer I, Beck A, Lehrach H, Reinhardt R, Pohl TM, Eger P, Zimmermann

- 610 W, Wedler H, Wambutt R, Purnelle B, Goffeau A, Cadieu E, Dréano S, Gloux S, Lelaure V,  
611 Mottier S, Galibert F, Aves SJ, Xiang Z, Hunt C, Moore K, Hurst SM, Lucas M, Rochet M,  
612 Gaillardin C, Tallada VA, Garzon A, Thode G, Daga RR, Cruzado L, Jimenez J, Sánchez M, del  
613 Rey F, Benito J, Domínguez A, Revuelta JL, Moreno S, Armstrong J, Forsburg SL, Cerutti L,  
614 Lowe T, McCombie WR, Paulsen I, Potashkin J, Shpakovski G V, Ussery D, Barrell BG, Nurse P,  
615 Cerrutti L. 2002. The genome sequence of *Schizosaccharomyces pombe*. *Nature* 415:871–80.
- 616 45. Cromie GA, Rubio CA, Hyppa RW, Smith GR. 2005. A natural meiotic DNA break site in  
617 *Schizosaccharomyces pombe* is a hotspot of gene conversion, highly associated with crossing  
618 over. *Genetics* 169:595–605.
- 619 46. Farah JA, Cromie GA, Smith GR. 2009. Ctp1 and Exonuclease 1, alternative nucleases regulated  
620 by the MRN complex, are required for efficient meiotic recombination. *Proc Natl Acad Sci U S A*  
621 106:9356–61.
- 622 47. Forsburg SL. 1994. Codon usage table for *Schizosaccharomyces pombe*. *Yeast* 10:1045–7.
- 623 48. Watson AT, Daigaku Y, Mohebi S, Etheridge TJ, Chahwan C, Murray JM, Carr AM. 2013.  
624 Optimisation of the *Schizosaccharomyces pombe* *urg1* expression system. *PLoS One* 8:e83800.
- 625 49. Watt S, Mata J, López-Maury L, Marguerat S, Burns G, Bähler J. 2008. *urg1*: a uracil-regulatable  
626 promoter system for fission yeast with short induction and repression times. *PLoS One* 3:e1428.
- 627 50. Li P, Li J, Li M, Dou K, Zhang M-J, Suo F, Du L-L. 2012. Multiple end joining mechanisms  
628 repair a chromosomal DNA break in fission yeast. *DNA Repair (Amst)* 11:120–30.
- 629 51. Wood V, Harris M a., McDowall MD, Rutherford K, Vaughan BW, Staines DM, Aslett M, Lock  
630 A, Bähler J, Kersey PJ, Oliver SG. 2012. PomBase: A comprehensive online resource for fission  
631 yeast. *Nucleic Acids Res* 40:695–699.
- 632 52. Wang X, Baumann P. 2008. Chromosome fusions following telomere loss are mediated by single-  
633 strand annealing. *Mol Cell* 31:463–73.
- 634 53. Webb CJ, Zakian VA. 2008. Identification and characterization of the *Schizosaccharomyces*

- 635 pombe TER1 telomerase RNA. *Nat Struct Mol Biol* 15:34–42.
- 636 54. Bairley RCB, Guillaume G, Vega LR, Friedman KL. 2011. A mutation in the catalytic subunit of  
637 yeast telomerase alters primer-template alignment while promoting processivity and protein-DNA  
638 binding. *J Cell Sci* 124:4241–52.
- 639 55. Murray AW, Claus TE, Szostak JW. 1988. Characterization of two telomeric DNA processing  
640 reactions in *Saccharomyces cerevisiae*. *Mol Cell Biol* 8:4642–50.
- 641 56. Gao Q, Reynolds GE, Wilcox A, Miller D, Cheung P, Artandi SE, Murnane JP. 2008.  
642 Telomerase-dependent and -independent chromosome healing in mouse embryonic stem cells.  
643 *DNA Repair (Amst)* 7:1233–49.
- 644 57. Wellinger RJ, Zakian VA. 2012. Everything you ever wanted to know about *Saccharomyces*  
645 *cerevisiae* telomeres: beginning to end. *Genetics* 191:1073–105.
- 646 58. Lydeard JR, Lipkin-Moore Z, Jain S, Eapen V V, Haber JE. 2010. Sgs1 and exo1 redundantly  
647 inhibit break-induced replication and de novo telomere addition at broken chromosome ends.  
648 *PLoS Genet* 6:e1000973.
- 649 59. Grimm C, Kohli J, Murray J, Maundrell K. 1988. Genetic engineering of *Schizosaccharomyces*  
650 *pombe*: a system for gene disruption and replacement using the *ura4* gene as a selectable marker.  
651 *Mol Gen Genet* 215:81–6.
- 652 60. Elgin SCR, Reuter G. 2013. Position-effect variegation, heterochromatin formation, and gene  
653 silencing in *Drosophila*. *Cold Spring Harb Perspect Biol* 5:a017780.
- 654 61. Sabatier L, Ricoul M, Pottier G, Murnane JP. 2005. The loss of a single telomere can result in  
655 instability of multiple chromosomes in a human tumor cell line. *Mol Cancer Res* 3:139–50.
- 656 62. Yu S, Graf WD. 2010. Telomere capture as a frequent mechanism for stabilization of the terminal  
657 chromosomal deletion associated with inverted duplication. *Cytogenet Genome Res* 129:265–74.
- 658 63. Yatsenko SA, Brundage EK, Roney EK, Cheung SW, Chinault AC, Lupski JR. 2009. Molecular  
659 mechanisms for subtelomeric rearrangements associated with the 9q34.3 microdeletion syndrome.

- 660 Hum Mol Genet 18:1924–36.
- 661 64. Osborne EA, Hiraoka Y, Rine J. 2011. Symmetry, asymmetry, and kinetics of silencing  
662 establishment in *Saccharomyces cerevisiae* revealed by single-cell optical assays. *Proc Natl Acad*  
663 *Sci U S A* 108:1209–16.
- 664 65. Hathaway NA, Bell O, Hodges C, Miller EL, Neel DS, Crabtree GR. 2012. Dynamics and  
665 memory of heterochromatin in living cells. *Cell* 149:1447–60.
- 666 66. Klar AJS, Ishikawa K, Moore S. 2014. A Unique DNA Recombination Mechanism of the  
667 Mating/Cell-type Switching of Fission Yeasts: a Review. *Microbiol Spectr* 2:1–16.
- 668 67. Martienssen R, Moazed D. 2015. RNAi and heterochromatin assembly. *Cold Spring Harb*  
669 *Perspect Biol* 7:a019323.
- 670 68. Allshire RC, Ekwall K. 2015. Epigenetic Regulation of Chromatin States in *Schizosaccharomyces*  
671 *pombe*. *Cold Spring Harb Perspect Biol* 7:a018770.
- 672 69. Kageyama S, Liu H, Kaneko N, Ooga M, Nagata M, Aoki F. 2007. Alterations in epigenetic  
673 modifications during oocyte growth in mice. *Reproduction* 133:85–94.
- 674 70. Ge Z-J, Schatten H, Zhang C-L, Sun Q-Y. 2015. Oocyte ageing and epigenetics. *Reproduction*  
675 149:R103-14.
- 676 71. Moreno S, Klar A, Nurse P. 1991. Molecular genetic analysis of fission yeast  
677 *Schizosaccharomyces pombe*. *Methods Enzymol* 194:795–823.
- 678 72. Forsburg SL. 2011. PombeNet: Drugs.
- 679 73. Erler A, Maresca M, Fu J, Stewart AF. 2006. Recombineering reagents for improved inducible  
680 expression and selection marker re-use in *Schizosaccharomyces pombe*. *Yeast* 23:813–23.
- 681 74. Muhlrad D, Hunter R, Parker R. 1992. A rapid method for localized mutagenesis of yeast genes.  
682 *Yeast* 8:79–82.
- 683 75. Ray A, Runge KW. 1999. The yeast telomere length counting machinery is sensitive to sequences  
684 at the telomere-nontelomere junction. *Mol Cell Biol* 19:31–45.

- 685 76. Hector RE, Ray A, Chen B-R, Shtofman R, Berkner KL, Runge KW. 2012. Mec1p associates  
686 with functionally compromised telomeres. *Chromosoma* 121:277–90.
- 687 77. Förstemann K, Höss M, Lingner J. 2000. Telomerase-dependent repeat divergence at the 3' ends  
688 of yeast telomeres. *Nucleic Acids Res* 28:2690–4.
- 689 78. Moser BA, Chang Y, Nakamura TM. 2014. Telomere regulation during the cell cycle in fission  
690 yeast. *Methods Mol Biol* 1170:411–24.
- 691 79. Fisher TS, Taggart AKP, Zakian VA. 2004. Cell cycle-dependent regulation of yeast telomerase  
692 by Ku. *Nat Struct Mol Biol* 11:1198–205.
- 693 80. Kiely CM, Marguerat S, Garcia JF, Madhani HD, Bähler J, Winston F. 2011. Spt6 is required for  
694 heterochromatic silencing in the fission yeast *Schizosaccharomyces pombe*. *Mol Cell Biol*  
695 31:4193–204.
- 696 81. Kato H, Okazaki K, Iida T, Nakayama J-I, Murakami Y, Urano T. 2013. Spt6 prevents  
697 transcription-coupled loss of posttranslationally modified histone H3. *Sci Rep* 3:2186.
- 698 82. Yamada S, Ohta K, Yamada T. 2013. Acetylated Histone H3K9 is associated with meiotic  
699 recombination hotspots, and plays a role in recombination redundantly with other factors  
700 including the H3K4 methylase Set1 in fission yeast. *Nucleic Acids Res* 41:3504–17.
- 701 83. Oya E, Kato H, Chikashige Y, Tsutsumi C, Hiraoka Y, Murakami Y. 2013. Mediator directs co-  
702 transcriptional heterochromatin assembly by RNA interference-dependent and -independent  
703 pathways. *PLoS Genet* 9:e1003677.
- 704 84. Kramer KM, Haber JE. 1993. New telomeres in yeast are initiated with a highly selected subset of  
705 TG1-3 repeats. *Genes Dev* 7:2345–56.
- 706
- 707

708 **Figures**

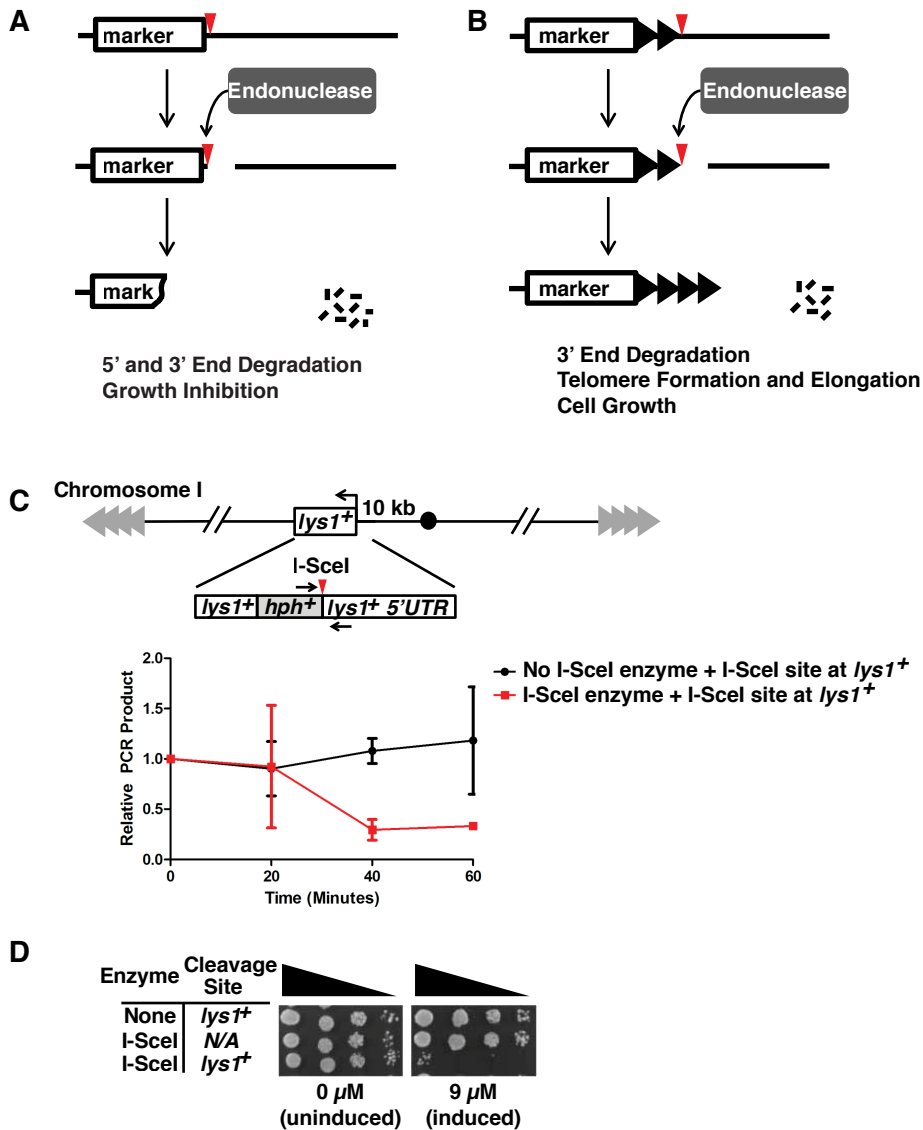

709

710 **Figure 1. Double-strand break (DSB) systems and rapid I-SceI DSB formation. (A) Inducible**  
 711 **DSB system.** A restriction enzyme/endonuclease with no natural sites in the genome is produced in  
 712 cells from a rapidly inducible promoter. After addition of the inducer and production of the  
 713 endonuclease, a single site introduced into the genome (red triangle) can be cut to produce a DSB. In  
 714 the DSB system, the strands both 5' and 3' to the endonuclease site are degraded (indicated by small  
 715 black lines and loss of the marker DNA) and cell growth is inhibited. **(B) Inducible telomere**  
 716 **formation system.** The new DSB exposes telomere repeats (black triangles) to form a new functional  
 717 telomere that is stable and elongated. If the chromosomal sequences 3' to the endonuclease site are  
 Page 30 of 45

718 dispensable, the new functional telomere allows normal cell growth. **(C) Rapid induction of an I-SceI-**  
719 **generated DSB.** The I-SceI restriction site was inserted into the 5' UTR of *lysI*<sup>+</sup>, a gene located 10 kb  
720 from the centromere of chromosome I. The expression of I-SceI was induced by the addition of ahTET  
721 to 9 μM. Cell samples were taken before (0 min) and after ahTET addition in 20 min intervals.  
722 Genomic DNA was prepared and assayed for cleavage at the I-SceI site by qPCR using primers across  
723 the site (denoted by black arrows) and normalizing to the production of a similarly sized fragment at  
724 *his3*<sup>+</sup> (as in (34)). The average values of two independent experiments (where each qPCR is performed  
725 in triplicate for each experiment) and the SEM are shown. About 75% of the sites are cleaved by 40 min  
726 in this assay. We note that this assay cannot distinguish between sites that were never cut and those that  
727 were cut and then ligated back together with or without mutation of the site. **(D) The I-SceI DSB**  
728 **causes growth arrest.** Five-fold serial dilutions of cells bearing either the *lysI*<sup>+</sup> allele with or without  
729 the I-SceI site or the expression vector with or without the I-SceI gene were spotted onto rich medium  
730 with either 0 or 9 μM ahTET. Only those cells with both the I-SceI expression vector and the I-SceI site  
731 have the capability of producing a DSB, and these cells showed the growth inhibition associated with  
732 DSB induction.  
733

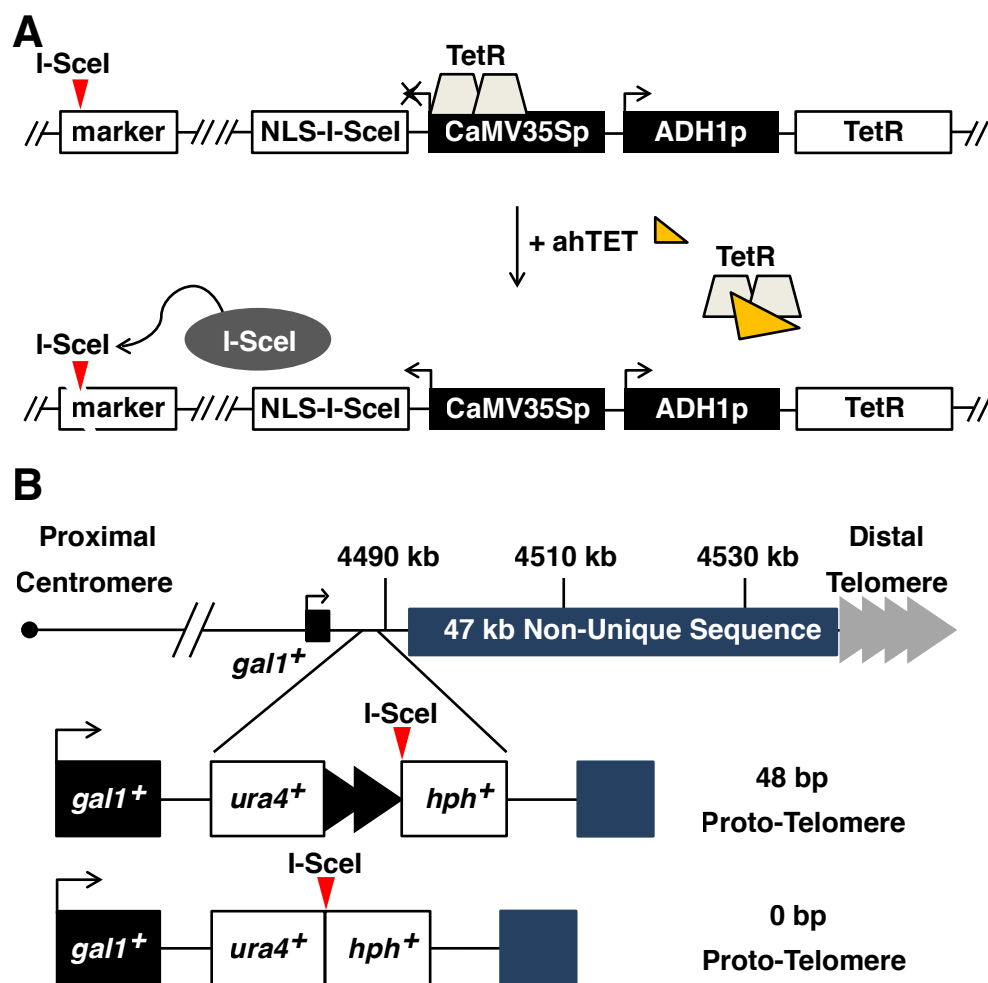

734

735 **Figure 2. The I-SceI telomere formation system. (A)** The I-SceI endonuclease was expressed from  
 736 the tetracycline repressor (TetR) controlled CaMV35S promoter in a cassette that also expresses TetR.  
 737 The addition of anhydrotetracycline (ahTET) induces I-SceI expression, which then cuts at sites  
 738 introduced into the genome (red triangle). **(B)** The 48 bp proto-telomere contains the *ura4<sup>+</sup>* gene  
 739 followed by 48 bp of telomere repeats (black triangles) and the hygromycin resistance marker (*hph<sup>+</sup>*),  
 740 while the 0 bp proto-telomere control lacks the telomere repeats. Both cassettes were inserted into the  
 741 unique DNA 3' of the *gal1<sup>+</sup>* gene. The *S. pombe* endogenous telomere repeat tracts are indicated by  
 742 grey triangles.

743



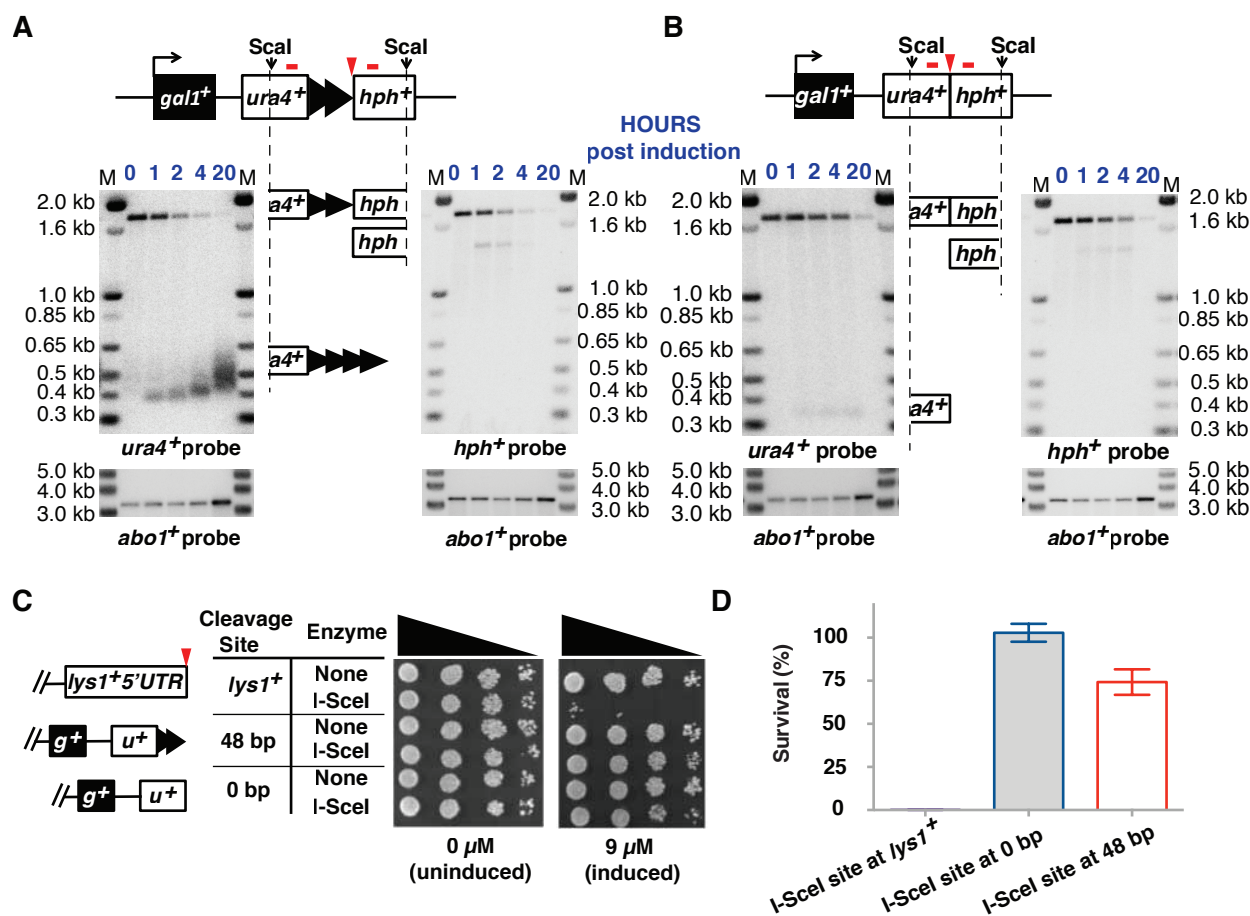

744

745 **Figure 3. I-SceI cleavage converts the 48 bp proto-telomere to a telomere.** (A) Exponentially  
 746 growing cells bearing the 48 bp proto-telomere and the I-SceI expression cassette were treated with  
 747 ahTET and aliquots were taken either prior to treatment (0 h) or after treatment (1 to 20 h). Genomic  
 748 DNA was digested with ScaI and analyzed by Southern analysis using probes to *ura4<sup>+</sup>* or *hph<sup>+</sup>* (denoted  
 749 by red bars above each locus). The I-SceI site is marked by a red triangle. The proto-telomere fragment  
 750 is rapidly converted to the smaller *ura4<sup>+</sup>* and *hph<sup>+</sup>* fragments. The cleaved *ura4<sup>+</sup>* and *hph<sup>+</sup>* ScaI-I-SceI  
 751 bands are indicated by partial ideograms of the original diagram of the proto-telomere. Molecular  
 752 weight standards in kb are shown (M). The numbers in blue on top of the blot represent the hours after  
 753 the induction. As these cells double every 4.5 hours, the 4 h time point is less than 1 population  
 754 doubling. At the 20 h time point, the cells had doubled 3 times before growth stopped in stationary  
 755 phase. As a control for loading, the blots were re-probed with a control *abo1<sup>+</sup>* probe, as shown at the

756 bottom. **(B)** Cells bearing the 0 bp proto-telomere cassette were treated and analyzed as in panel A. **(C)**  
757 Serial five-fold dilutions of cells bearing I-SceI sites at *lysI*<sup>+</sup> and the 48 and 0 bp proto-telomere  
758 cassettes were spotted onto minimal media that lacks or has 9 μM ahTET. “g<sup>+</sup>” represents *galI*<sup>+</sup>, while  
759 “u<sup>+</sup>” represents *ura4*<sup>+</sup>. **(D)** Quantitative analysis of survival of the strains in C after induction of I-SceI.  
760 Survival of both the 0 bp and 48 bp proto-telomere strains were significantly different than the strain  
761 bearing the I-SceI site at *lysI*<sup>+</sup> ( $p < 0.01$ , t-test). The 0 bp and 48 bp strains were not significantly  
762 different ( $p = 0.09$ , t-test). Error bars show SEM from duplicate assays.  
763

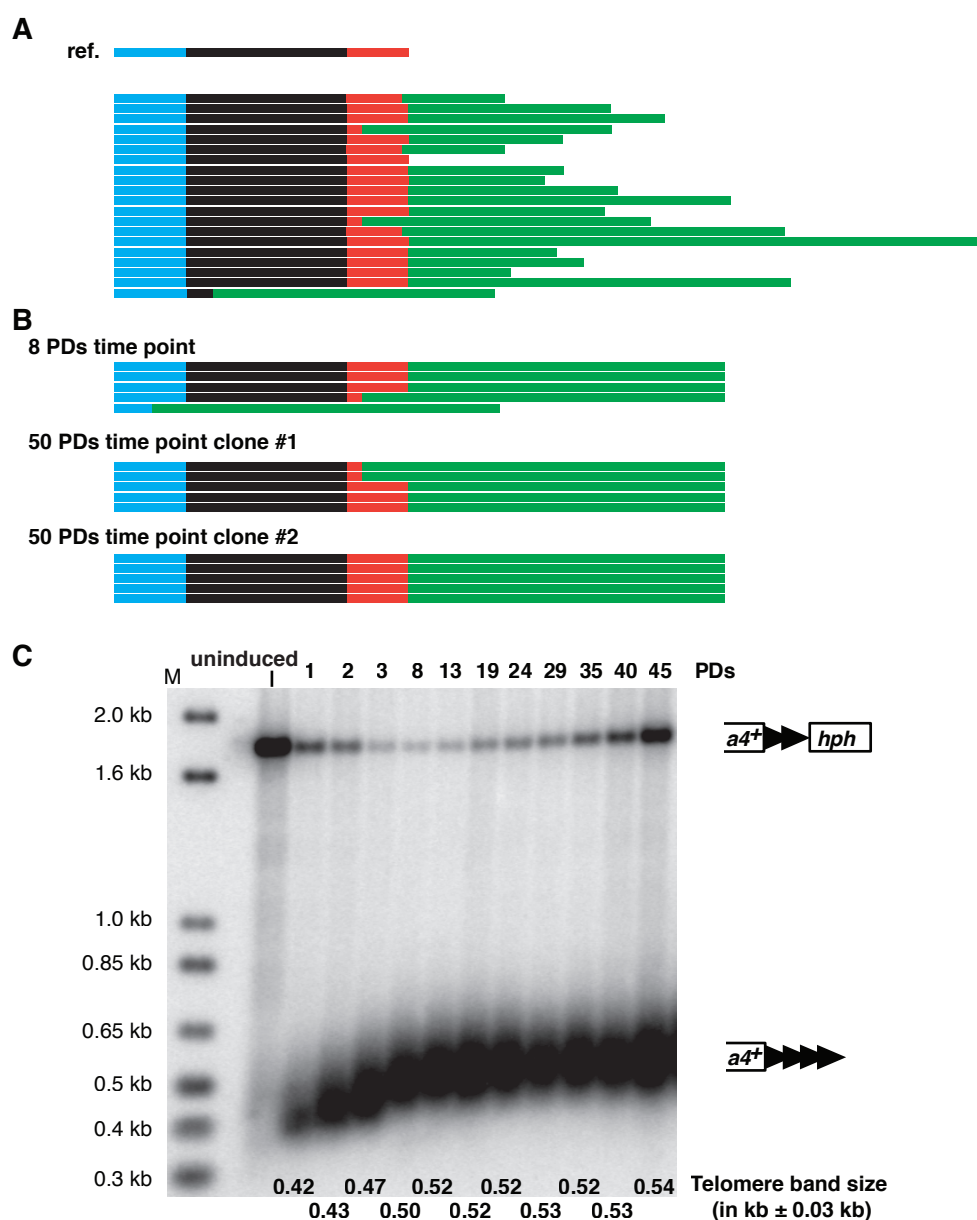

764

765 **Figure 4. Analysis of the newly added telomere repeats at 48 bp proto-telomere. (A) The sequence**  
 766 **of newly added telomere repeats from cells at the 1 PD time point (4 h post-induction).** The top  
 767 row (labeled “ref.”) shows the reference sequence of 48 bp proto-telomere in different colored bars. The  
 768 bar in blue represents part of the 48 bp of telomere repeats. The black shows the polylinker sequence,  
 769 and the red shows the I-SceI site including the overhang after I-SceI cleavage. The bars below are from  
 770 20 individual clones collected at the 1 PD time point. The green bar shows the newly added telomere  
 771 repeats. Interestingly, all but one of telomere repeat addition was to the I-SceI site or polylinker

772 sequences, similar to telomerase-mediated repeat addition in *S. cerevisiae* (54, 55, 84) and mammalian  
773 cells (38, 56). **(B) Telomere sequences cloned from the 8 PDs time point or different clones from**  
774 **the 50 PDs time point.** These fully elongated telomeres still retain the polylinker and I-SceI site in all  
775 but one case, indicating this conformation forms a stable telomere. Only the telomere repeat sequences  
776 closest to the addition site were shown. The detailed sequences in panel (A) and (B) are shown in  
777 Figure S1. **(C) Telomere repeat tracts are fully elongated by ~8 PDs after proto-telomere cleavage.**  
778 After induction of I-SceI, cells were grown for multiple PDs in liquid culture with 9  $\mu$ M ahTET by serial  
779 dilution, and samples from different time points were processed for Southern blotting using *ura4*<sup>+</sup> as  
780 probe as in Figure 3A. These data reveal that cells with an uncleaved proto-telomere had a growth  
781 advantage over cells with the new telomere, such that the cells with the uncleaved proto-telomere  
782 increased in proportion as cell grew. The uncleaved proto-telomeres most likely resulted from cassettes  
783 that were cut and healed by a DNA repair event that eliminated the I-SceI site.  
784

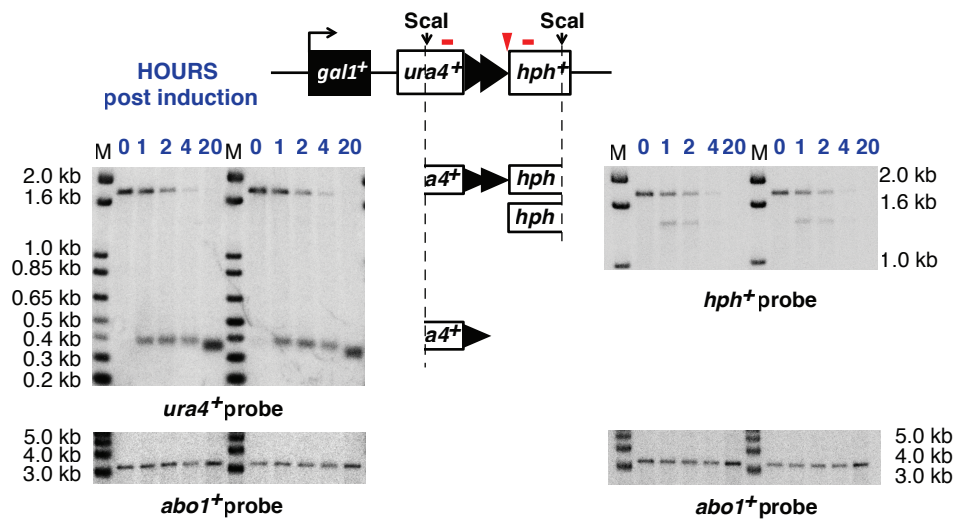

785

786 **Figure 5. Telomerase null cells have no telomere elongation after induction of chromosome**

787 **breakage.** Two independent telomerase null (*ter1Δ*) mutants were separately induced with ahTET and

788 analyzed as in Figure 3A. The *ura4<sup>+</sup>* and *hph<sup>+</sup>* *Scal* bands are indicated by partial ideograms of the

789 uncut proto-telomere diagram.

790

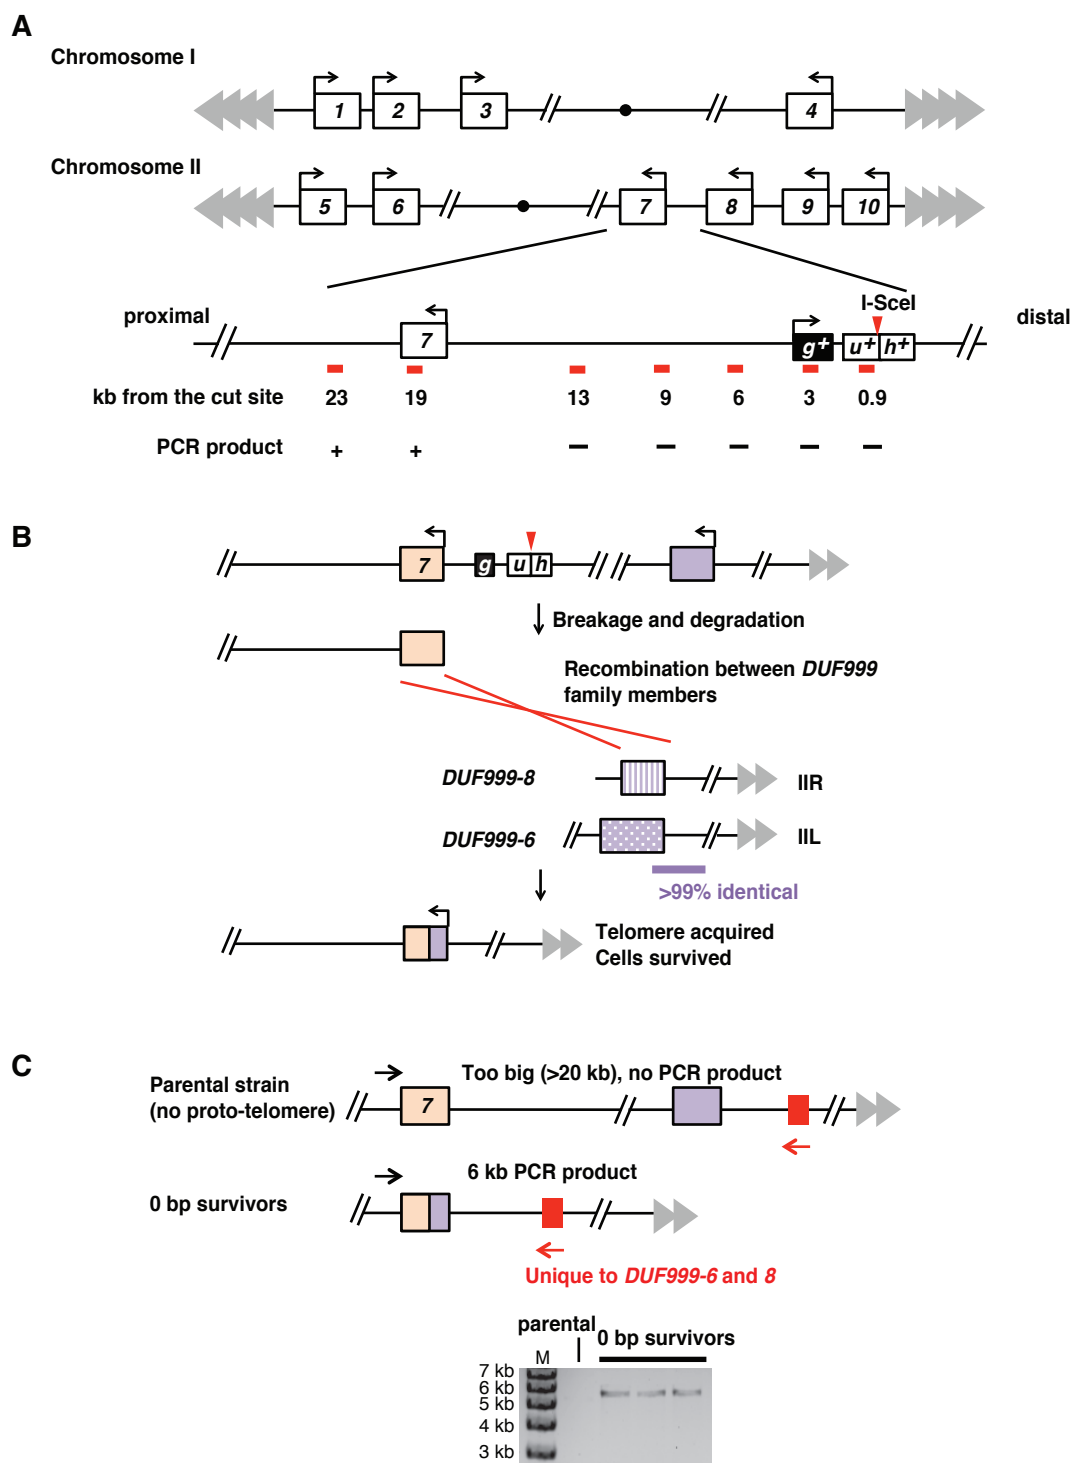

791

792 **Figure 6. The genome organization of *S. pombe* allows efficient healing of the 0 bp proto-telomere.**

793 **(A) A map of the *DUF999* gene family on chromosomes I and II.** All 10 genes from this family are

794 in the same orientation with transcription towards the centromere (the filled black circle). The

795 chromosome III subtelomeres consist of scores of ribosomal RNA gene repeats (44), and are not shown.

796 The region near *DUF999 protein 7* gene that is just internal to the 0 bp proto-telomere insertion site is  
797 expanded, showing the relative position of the proto-telomere and the distance of different primer pairs  
798 (shown as red bars) from the I-SceI site. A “+” indicates that a PCR product was obtained from each of  
799 the three surviving cleaved 0 bp proto-telomere strains tested and a “-” indicates that a product was not  
800 obtained. The *DUF999 protein 7* gene was the closest gene to the degradation endpoint. **(B) A**  
801 **hypothesis to explain how the *DUF999* gene family can provide a backup mechanism to rescue a**  
802 **DSB near the subtelomere.** After induction of a DSB at the 0 bp proto-telomere, DNA is degraded at  
803 both ends (Figure 3B). The generation of degraded DNA in the *DUF999 family protein 7* gene can  
804 produce a recombinogenic DSB that can undergo recombination with other *DUF999* genes (purple box)  
805 to acquire a new telomere. To test this hypothesis, we performed inverse circle PCR (see Materials and  
806 Methods) and determined the sequences that had been fused to the *DUF999 protein family 7* gene. We  
807 found a recombination donor that could be from *DUF999 protein family 3, 6* or *8*. **(C) PCR to confirm**  
808 **the recombination event.** *DUF999 family proteins 6* and *8* have a unique region (red box) that is  
809 absent from the *DUF999 family protein 3* gene region. PCR using a specific primer to this region (red  
810 arrow) and a unique primer at *DUF999 protein family 7* (black arrow) revealed that the three strains that  
811 survived the induction of the DSB (the 0 bp survivors) were generated from the recombination between  
812 *DUF999 protein family 7* gene and *DUF999 protein family 6* or *8* genes. The sequence between  
813 *DUF999 protein family 6* and its telomere is nearly identical to the sequence between *DUF999 protein*  
814 *family 8* and its telomere, and thus the recombination event that rescued the DSB was not pursued  
815 further.  
816

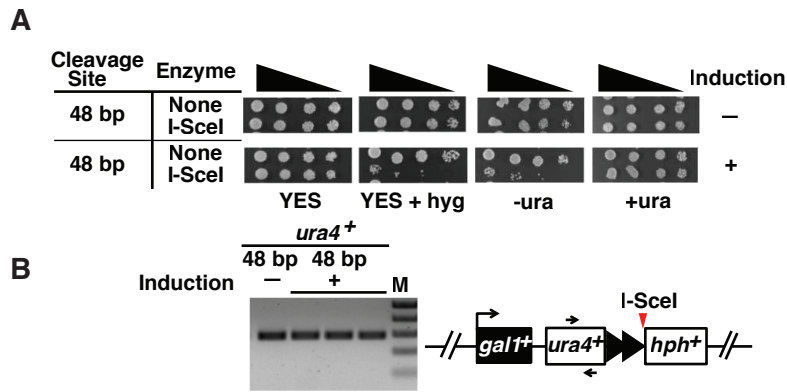

817

818 **Figure 7. Telomeric *ura4<sup>+</sup>* is silenced.** (A) Growth of cells containing the 48 bp proto-telomere before

819 and after 20 h of I-SceI induction was assessed by spotting five-fold serial dilutions of cells onto rich

820 media plates (YES (71)) with and without hygromycin (hyg), or synthetic medium with (+ura) or

821 without (-ura) uracil. (B) The presence of the *ura4<sup>+</sup>* gene in untreated 48 bp proto-telomere cells prior

822 to induction (-) or in three independent Ura<sup>-</sup> Hyg<sup>S</sup> colonies derived from ahTET treated cells (+) was

823 tested by PCR. Primers are indicated by black arrows.

824



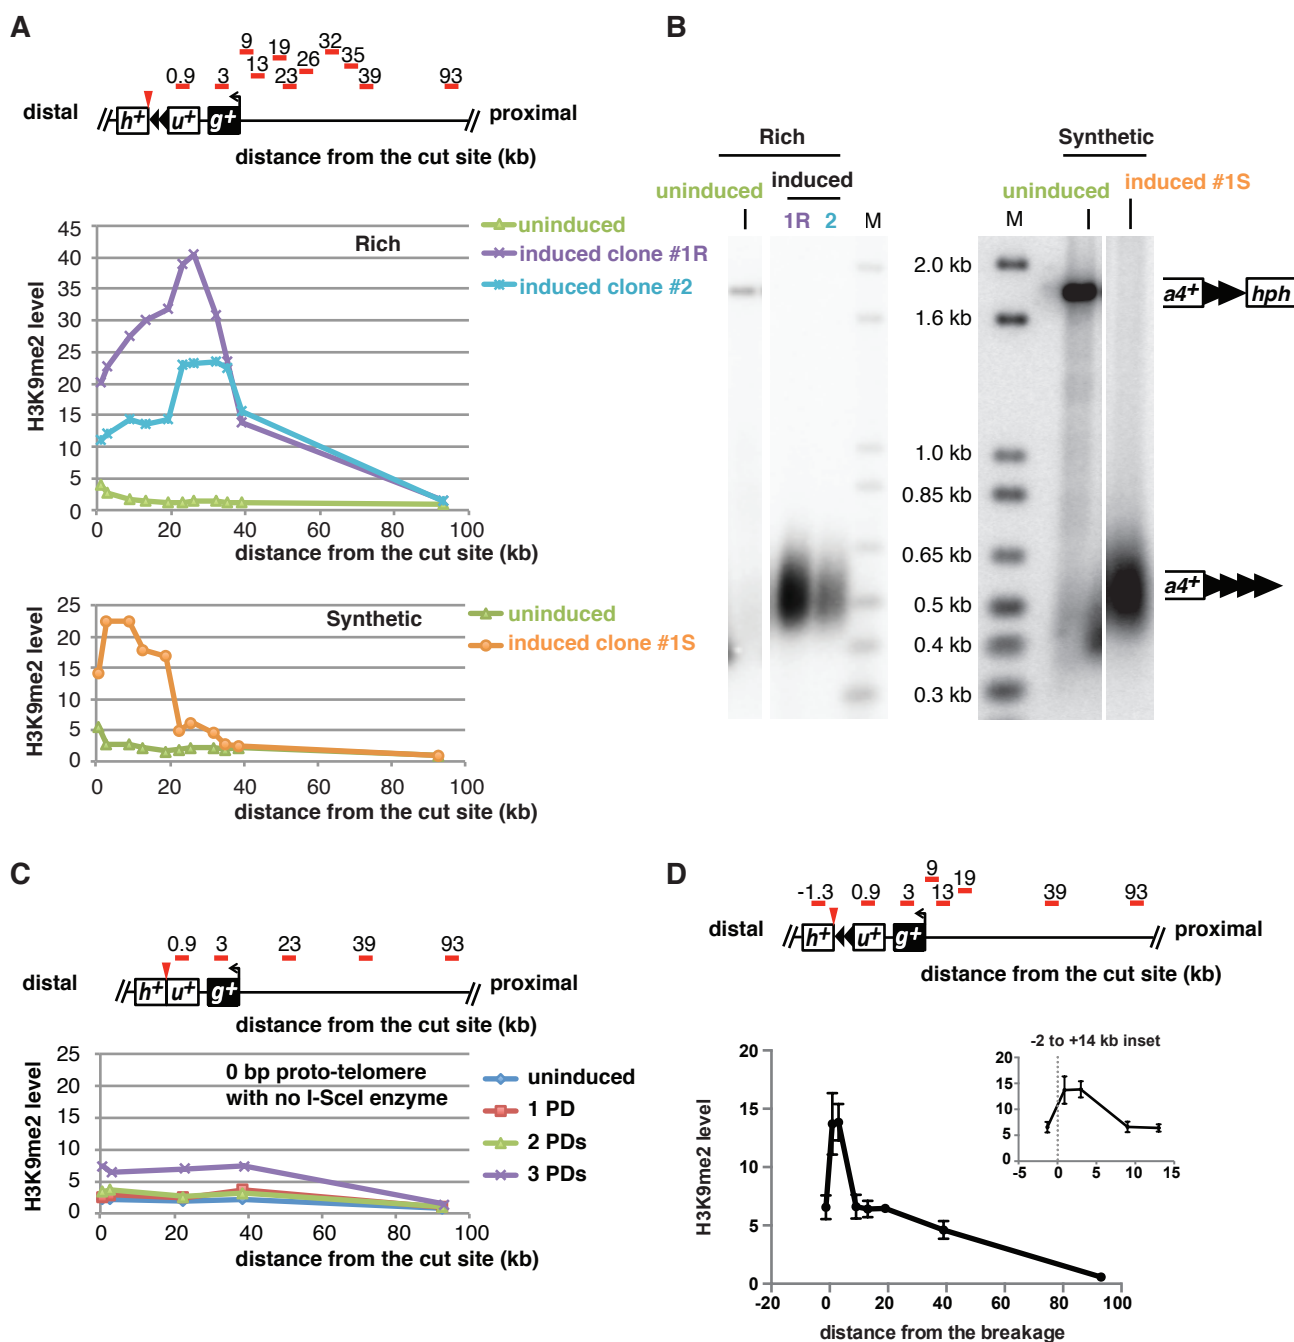

825

826 **Figure 8. Different telomeric H3K9me2 domains form in cells with telomeres of similar size. (A)**

827 **The level of histone H3K9me2 enrichment at each locus (primers locations are shown as red bars)**

828 **is shown.** The purple and cyan lines (top) show two individual clones of 48 bp proto-telomere grown in

829 rich medium (YES + 3% glucose) for 50 PDs after induction, which both peak at the 26 kb locus. In

830 contrast, cells grown in synthetic medium (EMMG with uracil + 2% glucose)(bottom) have the highest

831 H3K9me2 level at a locus much closer to the newly formed telomere. The green line (both top and  
832 bottom) represents the uninduced 48 bp proto-telomere, which shows a small increase next to the  
833 telomere repeat tracts in the proto-telomere. **(B) The established telomeres have similar lengths in**  
834 **cells from rich (left) or synthetic media (right).** The lanes with DNA from cells in panel A:  
835 uninduced cells are labeled in green while those with induced cell DNAs are in purple or cyan (left, in  
836 rich media) or orange (right, in synthetic media). Southern analysis used the *ura4<sup>+</sup>* probe, as in Figure  
837 3A. Molecular weight standards are labeled with “M”. **(C) 0 bp control cells do not have increased**  
838 **H3K9me2 level after induction.** The levels of histone H3K9me2 enrichment at each locus are shown.  
839 Distances are relative to the I-SceI cut site. Red bars indicate the PCR probes. A schematic of the 48 bp  
840 proto-telomere shows the location of the 0.9 and 3 kb probes in *ura4<sup>+</sup>* and *gal1<sup>+</sup>*, respectively. No major  
841 enrichment was seen in cells with 0 bp proto-telomere and no I-SceI gene. **(D) The H3K9me2 peak is**  
842 **localized on telomeric repeats in uninduced cells.** The levels of histone H3K9me2 enrichment at each  
843 locus are shown. Distances are relative to the I-SceI cut site. Red bars indicate the PCR probes. The  
844 leftmost -1.3 kb probe recognizes the *hph<sup>+</sup>* coding sequence and is 1.3 kb from the I-SceI site. The  
845 average and range of two independent tests are shown. The inset shows the H3K9me2 level from -2 to  
846 +14 kb and the I-SceI site at 0 kb is marked by a dashed grey line.  
847

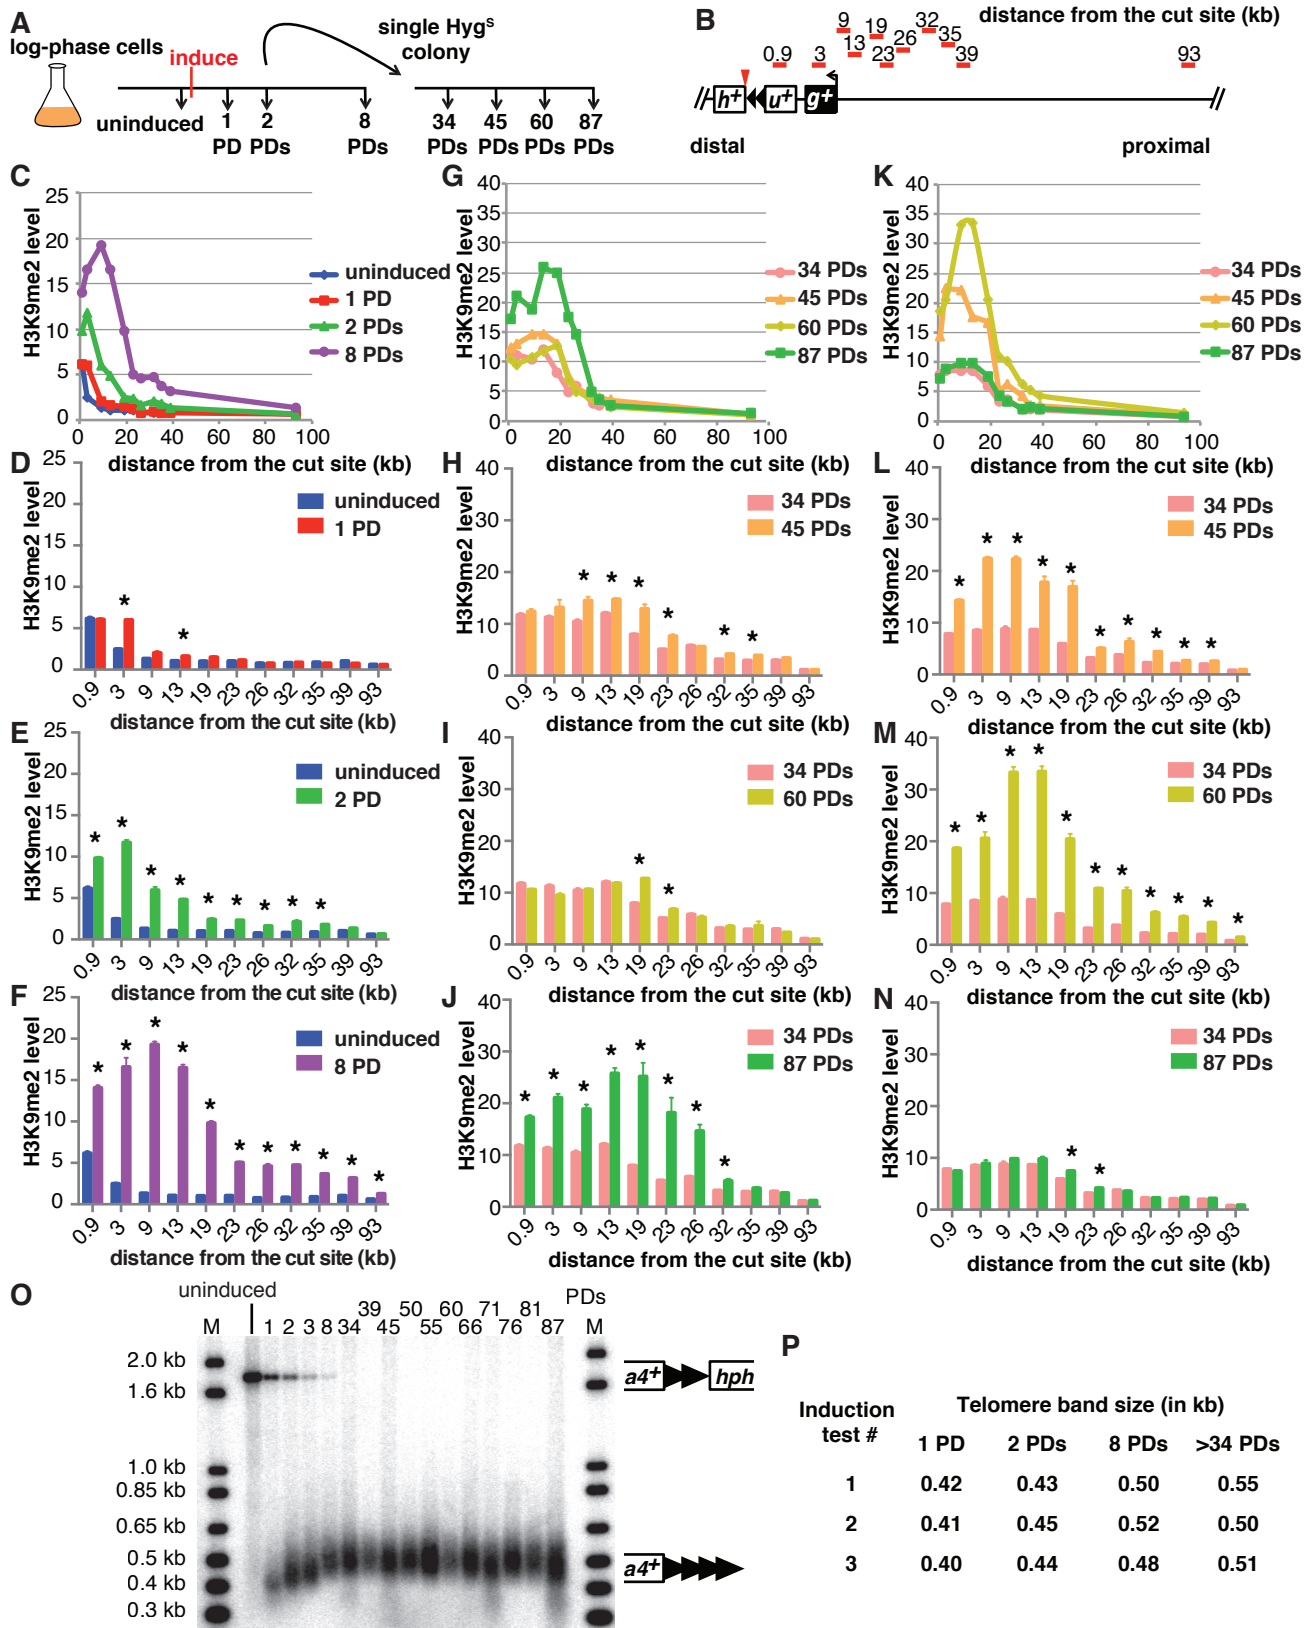

848

849 **Figure 9. The new H3K9me2 domain forms gradually as the new telomere reaches equilibrium.**

850 (A) Telomere formation is induced and samples were taken at different time points for analysis of

851 telomere length and H3K9me2 levels. **(B)** The primer sets used to monitor the levels of histone  
852 H3K9me2 enrichment at several loci are shown as red bars. Distances are relative to the site of I-SceI  
853 cut site, represented as a red triangle. The 0.9 and 3 kb probes are in *ura4<sup>+</sup>* (*u<sup>+</sup>*) and *gal1<sup>+</sup>* (*g<sup>+</sup>*),  
854 respectively. “*h<sup>+</sup>*” is *hph<sup>+</sup>*. **(C)** Kinetic analysis of the levels of histone H3K9me2 enrichment at several  
855 loci over 8 PDs, normalized to total histone H3 levels at each locus (Materials and Methods), are shown.  
856 **(D-F)** H3K9me2 levels at each locus and time point compared to the levels in uninduced cells bearing  
857 the 48 bp proto-telomere. Statistically significant differences for each locus compared to the uninduced  
858 level ( $p < 0.05$ , t-test) are marked by an asterisk. Error bars show the SEM of triplicate assays. **(G)**  
859 Kinetic analysis of heterochromatin spreading of a single Hyg<sup>S</sup> colony (panel A), shown as in C. **(H-J)**  
860 H3K9me2 levels at each locus and time point compared to the 34 PDs culture for the Hyg<sup>S</sup> colony  
861 shown in G. Statistically significant differences ( $p < 0.05$ , t-test) are indicated by an asterisk. **(K)** Kinetic  
862 analysis of a second independent Hyg<sup>S</sup> colony, as in C and G. PD 0-8 of this experiment are shown in  
863 Figure S2A. **(L-N)** Analysis of individual time points shown in K as in H-J. **(O)** Telomere size was  
864 measured at different time points after induction by Southern analysis using a *ura4<sup>+</sup>* probe as in Figure  
865 3A. Molecular weight standards are labeled with “M”. **(P) Telomere elongation is nearly identical in**  
866 **independent telomere formation experiments.** The modal terminal restriction fragment (TRF) sizes  
867 (the *ura4<sup>+</sup>*-telomere repeats band) of the newly formed telomere at early and late population doublings  
868 (PDs) after induction with ahTET, were determined as the most intensely hybridizing part of the band on  
869 Southern blots. Band sizes on these blots vary by approximately  $\pm 0.03$  kb. Induction #1 sizes are from  
870 the formation experiment shown in panel K-N & Figure S2A. Induction #2 sizes are from the formation  
871 experiment in panel O. Induction #3 sizes are from the formation experiment in panel C-J.

872

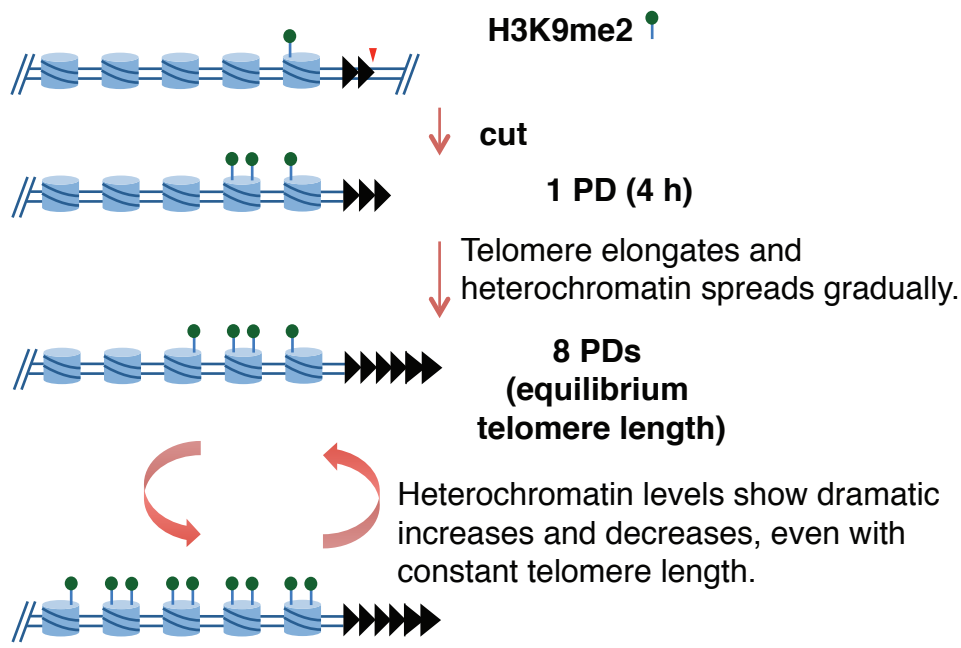

873

874 **Figure 10. Hypothesis for heterochromatin formation over multiple cell divisions.** The 48 bp proto-

875 telomere (black triangles) has a low level of H3K9me2 in nucleosomes (blue cylinders) of the adjacent

876 loci. While telomeres are immediately functional for end protection upon I-SceI breakage, only a small

877 amount of H3K9me2 mark has been established by 1 PD. Spreading gradually increases over 8 PDs.

878 However, the amount of spreading still varies as cells continue to grow, even though telomere repeat

879 tract length is constant. These increases may reflect more cells where both N-termini of histone H3 are

880 modified by lysine 9 dimethylation, a larger fraction of cells in the culture that have this modification at

881 these loci or both.
